# Supplementary material for: Genetic diversity analysis of brown marmorated stink bug, Halyomorpha halys based on mitochondrial COI and COII haplotypes
Source: BMC Genom Data. 2021 Feb 15;22:7. doi: 10.1186/s12863-021-00961-8 (PMC7885415; doi:10.1186/s12863-021-00961-8)
Supplement: Supplementary file 2 — Additional file 2. Haplotype information of the BMSB populations. [file 12863_2021_961_MOESM2_ESM.xlsx]

## Sheet: COI haplotypes
Haplotype	Accession	Sequence
H1	KF273380	ACTCTATACTTTATCTTCGGAATATGATCTGGAATAGTAGGATCAGCTATAAGATTAATTATCCGTATCGAATTAGGACAGCCTGGAAGATTTATTGGTAATGATCAAATTTATAATGTAATTGTAACAGCACATGCATTTGTAATAATTTTCTTTATAGTAATACCAATCATAATTGGAGGATTCGGTAATTGATTAGTCCCTTTAATAATTGGAGCACCTGATATAGCCTTCCCACGATTAAATAATATAAGATTCTGATTATTACCCCCTTCATTAACTTTATTATTAATAAGAAGAATAGCAGAATCAGGAGCTGGGACAGGATGAACAGTCTATCCCCCCTTATCAAGTAATATCTCACATAGAGGAGCATCAGTTGATTTAGCTATTTTTTCC…
H2	KF273381	ACTCTATACTTTATCTTCGGAATATGATCTGGAATAGTAGGATCAGCTATAAGATTAATTATCCGTATCGAATTAGGACAGCCTGGAAGATTTATTGGTAATGATCAAATTTATAATGTAATTGTAACAGCACATGCATTTGTAATAATTTTCTTTATAGTAATACCAATCATAATTGGAGGATTCGGTAATTGATTAGTCCCTTTAATAATTGGAGCACCTGATATAGCCTTCCCACGATTAAATAATATAAGATTCTGATTATTACCCCCTTCATTAACTTTATTATTAATAAGAAGAATAGCAGAATCAGGAGCTGGGACAGGATGAACAGTCTACCCCCCTTTATCGAGTAATATCTCACATAGAGGAGCATCAGTTGATTTAGCTATTTTTTCC…
H3	KF273382	ACTCTATACTTTATCTTCGGAATATGATCTGGAATAGTAGGATCAGCTATAAGATTAATTATCCGTATCGAATTAGGACAGCCTGGAAGATTTATTGGTAATGATCAAATTTATAATGTAATTGTAACAGCACATGCATTTGTAATAATTTTCTTTATAGTAATACCAATCATAATTGGAGGATTCGGTAATTGATTAGTCCCTTTAATAATTGGAGCACCTGATATAGCCTTCCCACGATTAAATAATATAAGATTCTGATTATTACCCCCTTCATTAACTTTATTATTAATAAGAAGAATAGCAGAATCAGGAGCTGGGACAGGATGAACAGTCTATCCCCCCTTATCGAGTAATATCTCACATAGAGGAGCATCAGTTGATTTAGCTATTTTTTCC…
H8	KF273387	ACTCTATACTTTATCTTCGGAATATGATCTGGAATAGTAGGATCAGCTATAAGATTAATTATCCGTATCGAATTAGGACAGCCTGGAAGATTTATTGGTAATGATCAAATTTATAATGTAATTGTAACAGCACATGCATTTGTAATAATTTTCTTTATAGTAATACCAATCATAATTGGAGGATTCGGTAATTGATTAGTCCCTTTAATAATTGGAGCACCTGATATAGCCTTCCCACGATTAAATAATATAAGATTCTGATTATTACCCCCTTCATTAACTTTATTATTAATAAGAAGAATAGCAGAATCAGGAGCTGGGACAGGATGAACAGTCTATCCCCCTTTATCGAGTAATATCTCACATAGAGGAGCATCAGTTGATTTAGCTATTTTTTCC…
H15	KF273394	ACTCTATACTTTATCTTCGGAATATGATCTGGAATAGTAGGATCAGCTATAAGATTAATTATCCGTATCGAATTAGGACAGCCTGGAAGATTTATTGGTAATGATCAAATTTATAATGTAATTGTAACAGCACATGCATTTGTAATAATTTTCTTTATAGTAATACCAATCATAATTGGAGGATTCGGTAATTGATTAGTCCCTTTAATAATTGGAGCACCTGATATAGCCTTCCCACGATTAAATAATATAAGATTCTGATTATTACCCCCTTCATTAACTTTATTATTAATAAGAAGAATAGCAGAATCAGGAGCTGGGACAGGATGAACAGTCTATCCCCCCTTATCAAGTAATATCTCACATAGAGGAGCATCAGTTGATTTAGCTATTTTTTCC…
H22	KF273401	ACTCTATACTTTATCTTCGGAATATGATCTGGAATAGTAGGATCAGCTATAAGATTAATTATCCGTATCGAATTAGGACAGCCTGGAAGATTTATTGGTAATGATCAAATTTATAATGTAATTGTAACAGCACATGCATTTGTAATAATTTTCTTTATAGTAATACCAATCATAATTGGAGGATTCGGTAATTGATTAGTCCCTTTAATAATTGGAGCACCTGATATAGCCTTCCCACGATTAAATAATATAAGATTCTGATTATTACCCCCTTCATTAACTTTATTATTAATAAGAAGAATAGCAGAATCAGGAGCTGGGACAGGATGAACAGTCTACCCCCCCTTATCGAGTAATATCTCACATAGAGGAGCATCAGTTGATTTAGCTATTTTTTCC…
H23	KF273402	ACTCTATACTTTATCTTCGGAATATGATCTGGAATAGTAGGATCAGCTATAAGATTAATTATCCGTATCGAATTAGGACAGCCTGGAAGATTTATTGGTAATGATCAAATTTATAATGTAATTGTAACAGCACATGCATTTGTAATAATTTTCTTTATAGTAATACCAATCATAATTGGAGGATTCGGTAATTGATTAGTCCCTTTAATAATTGGAGCACCTGATATAGCCTTCCCACGATTAAATAATATAAGATTCTGATTATTACCCCCTTCATTAACTTTATTATTAATAAGAAGAATAGCAGAATCAGGAGCTGGGACAGGATGAACAGTCTACCCTCCCTTATCGAGTAATATCTCACATAGAGGAGCATCAGTTGATTTAGCTATTTTTTCC…
H33	KR070751	ACTCTATACTTTATCTTCGGAATATGATCTGGAATAGTAGGATCAGCTATAAGATTAATTATCCGTATCGAATTAGGACAACCTGGAAGATTTATTGGTAATGATCAAATTTATAATGTAATTGTAACAGCACATGCATTTGTAATAATTTTCTTTATAGTAATACCAATCATAATTGGAGGATTCGGTAATTGATTAGTCCCTTTAATAATTGGAGCACCTGATATAGCCTTCCCACGATTAAATAATATAAGATTCTGATTATTACCCCCTTCATTAACTTTATTATTAATAAGAAGAATAGCAGAATCAGGAGCTGGGACAGGATGAACAGTCTACCCCCCCTTATCGAGTAATATCTCACATAGAGGAGCATCAGTTGATTTAGCTATTTTTTCC…
H48	KY710336	ACTCTATACTTTATCTTCGGGATATGATCTGGAATAGTAGGATCAGCTATAAGATTAATTATCCGTATCGAATTAGGACAGCCTGGAAGATTTATTGGTAATGATCAAATTTATAATGTAATTGTAACAGCACATGCATTTGTAATAATTTTCTTTATAGTAATACCAATCATAATTGGAGGATTCGGTAATTGATTAGTCCCTTTAATAATTGGAGCACCTGATATAGCCTTCCCACGATTAAATAATATAAGATTCTGATTATTACCCCCTTCATTAACTTTATTATTAATAAGAAGAATAGCAGAATCAGGAGCTGGGACAGGATGAACAGTCTACCCCCCCTTATCGAGTAATATCTCACATAGAGGAGCATCAGTTGATTTAGCTATTTTTTCC…
H27	MF537222	ACTCTATACTTTATCTTCGGAATATGATCTGGAATAGTAGGATCAGCTATAAGATTAATTATCCGTATCGAATTAGGACAGCCTGGAAGATTTATTGGTAATGATCAAATTTATAATGTAATTGTAACAGCACATGCATTTGTAATAATTTTCTTTATAGTAATACCAATCATAATTGGAGGATTCGGTAATTGATTAGTCCCTTTAATAATTGGAGCACCTGATATAGCCTTCCCACGATTAAATAATATAAGATTCTGATTATTACCCCCTTCATTAACTTTATTATTAATAAGAAGAATAGCAGAATCAGGAGCTGGGACAGGATGAACAGTCTACCCCCCCTTATCGAGTAATATCTCACATAGAGGAGCATCAGTTGATTTAGCTATTTTTTCC…
H39	MF537230	ACTCTATACTTTATCTTCGGAATATGATCTGGAATAGTAGGATCAGCTATAAGATTAATTATCCGTATCGAATTAGGACAGCCTGGAAGATTTATTGGTAATGATCAAATTTATAATGTAATTGTAACAGCACATGCATTTGTAATAATTTTCTTTATAGTAATACCAATCATAATTGGAGGATTCGGTAATTGATTAGTCCCTTTAATAATTGGAGCACCTGATATAGCCTTCCCACGATTAAATAATATAAGATTCTGATTATTACCCCCTTCATTAACTTTATTATTAATAAGAAGAATAGCAGAATCAGGAGCTGGGACAGGATGAACAGTCTACCCTCCCTTATCGAGTAATATCTCACATAGAGGAGCATCAGTTGATTTAGCTATTTTTTCC…
H40	MF537231	ACTCTATACTTTATCTTCGGAATATGATCTGGAATAGTAGGATCAGCTATAAGATTAATTATCCGTATCGAATTAGGACAGCCTGGAAGATTTATTGGTAATGATCAAATTTATAATGTAATTGTAACAGCACATGCATTTGTAATAATTTTCTTTATAGTAATACCAATCATAATTGGAGGATTCGGTAATTGATTAGTCCCTTTAATAATTGGAGCACCTGATATAGCCTTCCCACGATTAAATAATATAAGATTCTGATTATTACCCCCTTCATTAACTTTATTATTAATAAGAAGAATAGCAGAATCAGGAGCTGGGACAGGATGAACAGTCTACCCTCCCTTATCGAGTAATATCTCACATAGAGGAGCATCAGTTGATTTAGCTATTTTTTCC…
H41	MF537232	ACTCTATACTTTATCTTCGGAATATGATCTGGAATAGTAGGATCAGCTATAAGATTAATTATCCGTATCGAATTAGGACAGCCTGGAAGATTTATTGGTAATGATCAAATTTATAATGTAATTGTAACAGCACATGCATTTGTAATAATTTTCTTTATAGTAATACCAATCATAATTGGAGGATTCGGTAATTGATTAGTCCCTTTAATAATTGGAGCACCTGATATAGCCTTCCCACGATTAAATAATATAAGATTCTGATTATTACCCCCTTCATTAACTTTATTATTAATAAGAAGAATAGCAGAATCAGGAGCTGGGACAGGATGAACAGTCTACCCTCCCTTATCGAGTAATATCTCACATAGAGGAGCATCAGTTGATTTAGCTATTTTTTCC…
H43	MF537234	ACTCTATACTTTATCTTCGGAATATGATCTGGAATAGTAGGATCAGCTATAAGATTAATTATCCGTATCGAATTAGGACAGCCTGGAAGATTTATTGGTAATGATCAAATTTATAATGTAATTGTAACAGCACATGCATTTGTAATAATTTTCTTTATAGTAATACCAATCATAATTGGAGGATTCGGTAATTGATTAGTCCCTTTAATAATTGGAGCACCTGATATAGCCTTCCCACGATTAAATAATATAAGATTCTGATTATTACCCCCTTCATTAACTTTATTATTAATAAGAAGAATAGCAGAATCAGGAGCTGGGACAGGATGAACAGTCTACCCTCCCTTATCGAGTAATATCTCACATAGAGGAGCATCAGTTGATTTAGCTATTTTTTCC…
H45	MF537236	ACTCTATACTTTATCTTCGGAATATGATCTGGAATAGTAGGATCAGCTATAAGATTAATTATCCGTATCGAATTAGGACAGCCTGGAAGATTTATTGGTAATGATCAAATTTATAATGTAATTGTAACAGCACATGCATTTGTAATAATTTTCTTTATAGTAATACCAATCATAATTGGAGGATTCGGTAATTGATTAGTCCCTTTAATAATTGGAGCACCTGATATAGCCTTCCCACGATTAAATAATATAAGATTCTGATTATTACCCCCTTCATTAACTTTATTATTAATAAGAAGAATAGCAGAATCAGGAGCTGGGACAGGATGAACAGTCTACCCTCCCTTATCGAGTAATATCTCACATAGAGGAGCATCAGTTGATTTAGCTATTTTTTCC…
N1	MT517228	ACTCTATACTTTATCTTCGGAATATGATCTGGAATAGTAGGATCAGCTATAAGATTAATTATCCGTATCGAATTAGGACAGCCTGGAAGATTTATTGGTAATGATCAAATTTATAATGTAATTGTAACAGCACATGCATTTGTAATAATTTTCTTTATAGTAATACCAATCATAATTGGAGGATTCGGTAATTGATTAGTCCCTTTAATAATTGGAGCACCTGATATAGCCTTCCCACGATTAAATAATATAAGATTCTGATTATTACCCCCTTCATTAACTTTATTATTAATAAGAAGAATAGCAGAATCAGGAGCTGGGACAGGATGAACAGTCTACCCCCCCTTATCGAGTAATATCTCACATAGAGGAGCATCAGTTGATTTAGCTATTTTTTCC…
N3	MT517230	ACTCTATACTTTATCTTCGGAATATGATCTGGAATAGTAGGATCAGCTATAAGATTAATTATCCGTATCGAATTAGGACAGCCTGGAAGATTTATTGGTAATGATCAAATTTATAACGTAATTGTAACAGCACATGCATTTGTAATAATTTTCTTTATAGTAATACCAATCATAATTGGAGGATTCGGTAATTGATTAGTCCCTTTAATAATTGGAGCACCTGATATAGCCTTCCCACGATTAAATAATATAAGATTCTGATTATTACCCCCTTCATTAACTTTATTATTAATAAGAAGAATAGCAGAATCAGGAGCTGGGACAGGATGAACAGTCTACCCTCCCTTATCGAGTAATATCTCACATAGAGGAGCATCAGTTGATTTAGCTATTTTTTCC…
N4	MT517231	ACTCTATACTTTATCTTCGGAATATGATCTGGAATAGTAGGATCAGCTATAAGATTAATTATCCGTATCGAATTAGGACAGCCTGGAAGATTTATTGGTAATGATCAAATTTATAATGTAATTGTAACAGCACATGCATTTGTAATAATTTTCTTTATAGTAATACCAATCATAATTGGAGGATTCGGTAATTGATTAGTCCCTTTAATAATTGGAGCACCTGATATAGCCTTCCCACGATTAAATAATATAAGATTCTGATTATTACCCCCTTCATTAACTTTATTATTAATAAGAAGAATAGCAGAATCAGGAGCTGGGACAGGATGAACAGTCTACCCTCCCTTATCGAGTAATATCTCACATAGAGGAGCATCAGTTGATTTAGCTATTTTTTCC…
N5	MT517232	ACTCTATACTTTATCTTCGGAATATGATCTGGAATAGTAGGATCAGCTATAAGATTAATTATCCGTATCGAATTAGGACAGCCTGGAAGATTTATTGGTAATGATCAAATTTATAATGTAATTGTAACAGCACATGCATTTGTAATAATTTTCTTTATAGTAATACCAATCATAATTGGAGGATTCGGTAATTGATTAGTCCCTTTAATAATTGGAGCACCTGATATAGCCTTCCCACGATTAAATAATATAAGATTCTGATTATTACCCCCTTCATTAACTTTATTATTAATAAGAAGAATAGCAGAATCAGGAGCTGGGACAGGATGAACAGTCTACCCTCCCTTATCGAGTAATATCTCACATAGAGGAGCATCAGTTGATTTAGCTATTTTTTCC…
N6	MT517233	ACTCTATACTTTATCTTCGGAATATGATCTGGAATAGTAGGATCAGCTATAAGATTAATTATCCGTATCGAATTAGGACAGCCTGGAAGATTTATTGGTAATGATCAAATTTATAATGTAATTGTAACAGCACATGCATTTGTAATAATTTTCTTTATAGTAATACCAATCATAATTGGAGGATTCGGTAATTGATTAGTCCCTTTAATAATTGGAGCACCTGATATAGCCTTCCCACGATTAAATAATATAAGATTCTGATTATTACCCCCTTCATTAACTTTATTATTAATAAGAAGAATAGCAGAATCAGGAGCTGGGACAGGATGAACAGTCTACCCCCCCTTATCGAGTAATATTTCACATAGAGGAGCATCAGTTGATTTAGCTATTTTTTCC…
N7	MT517234	ACTCTATACTTTATCTTCGGAATATGATCTGGAATAGTAGGATCAGCTATAAGATTAATTATCCGTATCGAATTAGGACAGCCTGGAAGATTTATTGGTAATGATCAAATTTATAATGTAATTGTAACAGCACATGCATTTGTAATAATTTTCTTTATAGTAATACCAATCATAATTGGAGGATTCGGTAATTGATTAGTCCCTTTAATAATTGGAGCACCTGATATAGCCTTCCCACGATTAAATAATATAAGATTCTGATTATTACCCCCTTCATTAACTTTATTATTAATAAGAAGAATAGCAGAATCAGGAGCTGGGACAGGATGAACAGTCTACCCCCCCTTATCGAGTAATATTTCACATAGAGGAGCATCAGTTGATTTAGCTATTTTTTCC…
N8	MT517235	ACTCTATACTTTATCTTCGGAATATGGTCTGGAATAGTAGGATCAGCTATAAGATTAATTATCCGTATCGAATTAGGACAGCCTGGAAGATTTATTGGTAATGATCAAATTTATAATGTAATTGTAACAGCACATGCATTTGTAATAATTTTCTTTATAGTAATACCAATCATAATTGGAGGATTCGGTAATTGATTAGTCCCTTTAATAATTGGAGCACCTGATATAGCCTTCCCACGATTAAATAATATAAGATTCTGATTATTACCCCCTTCATTAACTTTATTATTAATAAGAAGAATAGCAGAATCAGGAGCTGGGACAGGATGAACAGTCTACCCCCCCTTATCAAGTAATATCTCACATAGAGGAGCATCAGTTGATTTAGCTATTTTTTCC…
N9	MT517236	ACTCTATACTTTATCTTCGGAATATGATCTGGAATAGTAGGATCAGCTATAAGATTAATTATCCGTATCGAATTAGGGCAGCCTGGAAGATTTATTGGTAATGATCAAATTTATAATGTAATTGTAACAGCACATGCATTTGTAATAATTTTCTTTATAGTAATACCAATCATAATTGGAGGATTCGGTAATTGATTAGTCCCTTTAATAATTGGAGCACCTGATATAGCCTTCCCACGATTAAATAATATAAGATTCTGATTATTACCCCCTTCATTAACTTTATTATTAATAAGAAGAATAGCAGAATCAGGAGCTGGGACAGGATGAACAGTCTACCCCCCCTTATCGAGTAATATCTCACATAGAGGAGCATCAGTTGATTTAGCTATTTTTTCC…
N12	MT517239	ACTCTATATTTTATCTTCGGAATATGATCTGGAATAGTAGGATCAGCTATAAGATTAATTATCCGTATCGAATTAGGACAGCCTGGAAGATTTATTGGTAATGATCAAATTTATAATGTAATTGTAACAGCACATGCATTTGTAATAATTTTCTTTATAGTAATACCAATCATAATTGGAGGATTCGGTAATTGATTAGTCCCTTTAATAATTGGAGCACCTGATATAGCCTTCCCACGATTAAATAATATAAGATTCTGATTATTACCCCCTTCATTAACTTTATTATTAATAAGAAGAATAGCAGAATCAGGAGCTGGGACAGGATGAACAGTCTACCCTCCCTTATCGAGTAATATCTCACATAGAGGAGCATCAGTTGATTTAGCTATTTTTTCC…
N13	MT517240	ACTCTATACTTTATCTTCGGAATATGATCTGGAATAGTAGGATCAGCTATAAGATTAATTATCCGTATCGAATTAGGACAGCCTGGAAGATTTATTGGTAATGATCAAATTTATAATGTAATTGTAACAGCACATGCATTTGTAATAATTTTCTTTATAGTAATACCAATCATAATTGGAGGATTCGGTAATTGATTAGTCCCTTTAATAATTGGAGCACCTGATATAGCCTTCCCACGATTAAATAATATAAGATTCTGATTATTACCCCCTTCATTAACTTTATTATTAATAAGAAGAATAGCAGAATCAGGAGCTGGGACAGGATGAACAGTTTACCCTCCCTTATCGAGTAATATCTCACATAGAGGAGCATCAGTTGATTTAGCTATTTTTTCC…
N14	MT517241	ACTCTATACTTTATCTTCGGAATATGATCTGGAATAGTAGGATCAGCTATAAGATTAATTATCCGTATCGAATTGGGACAGCCTGGAAGATTTATTGGTAATGATCAAATTTATAATGTAATTGTAACAGCACATGCATTTGTAATAATTTTCTTTATAGTAATACCAATCATAATTGGAGGATTCGGTAATTGATTAGTCCCTTTAATAATTGGAGCACCTGATATAGCCTTCCCACGATTAAATAATATAAGATTCTGATTATTACCCCCTTCATTAACTTTATTATTAATAAGAAGAATAGCAGAATCAGGAGCTGGGACAGGATGAACAGTCTACCCTCCCTTATCGAGTAATATCTCACATAGAGGAGCATCAGTTGATTTAGCTATTTTTTCC…
N15	MT517242	ACTCTATACTTTATCTTCGGAATATGATCTGGAATAGTAGGATCAGCTATAAGATTAATTATCCGTATCGAATTAGGACAACCTGGAAGATTTATTGGTAATGATCAAATTTATAATGTAATTGTAACAGCACATGCATTTGTAATAATTTTCTTTATAGTAATACCAATCATAATTGGAGGATTCGGTAATTGATTAGTCCCTTTAATAATTGGAGCACCTGATATAGCCTTCCCACGATTAAATAATATAAGATTCTGATTATTACCCCCTTCATTAACTTTATTATTAATAAGAAGAATAGCAGAATCAGGAGCTGGGACAGGATGAACAGTCTACCCTCCCTTATCGAGTAATATCTCACATAGAGGAGCATCAGTTGATTTAGCTATTTTTTCC…
N16	MT517243	ACTCTATACTTTATCTTCGGAATATGGTCTGGAATAGTAGGATCAGCTATAAGATTAATTATCCGTATCGAATTAGGACAGCCTGGAAGATTTATTGGTAATGATCAAATTTATAATGTAATTGTAACAGCACATGCATTTGTAATAATTTTCTTTATAGTAATACCAATCATAATTGGAGGATTCGGTAATTGATTAGTCCCTTTAATAATTGGAGCACCTGATATAGCCTTCCCACGATTAAATAATATAAGATTCTGATTATTACCCCCTTCATTAACTTTATTATTAATAAGAAGAATAGCAGAATCAGGAGCTGGGACAGGATGAACAGTCTACCCTCCCTTATCGAGTAATATCTCACATAGAGGAGCATCAGTTGATTTAGCTATTTTTTCC…
N21	MT517248	ACTCTATACTTTATCTTCGGAATATGATCTGGAATAGTAGGATCAGCTATAAGATTAATTATCCGTATCGAATTAGGACAGCCTGGAAGATTTATTGGTAATGATCAAATTTATAATGTAATTGTAACAGCACATGCATTTGTAATAATTTTCTTTATAGTAATACCAATCATAATTGGAGGATTCGGTAATTGATTAGTCCCTTTAATAATTGGAGCACCTGATATAGCCTTCCCACGATTAAATAATATAAGATTCTGATTATTACCCCCTTCATTAACTTTATTATTAATAAGAAGAATAGCAGAATCAGGAGCTGGGACAGGATGAACAGTCTACCCTCCCTTATCGAGTAATATCTCACATAGAGGAGCATCAGTTGATTTAGCTATTTTTTCC…
N22	MT517249	ACTCTATACTTTATCTTCGGAATATGATCTGGAATAGTAGGATCAGCTATAAGATTAATTATCCGTATCGAATTAGGACAGCCTGGAAGATTTATTGGTAATGATCAAATTTATAATGTAATTGTAACAGCACATGCATTTGTAATAATTTTCTTTATAGTAATACCAATCATAATTGGAGGATTCGGTAATTGATTAGTCCCTTTAATAATTGGAGCACCTGATATAGCCTTCCCACGATTAAATAATATAAGATTCTGATTATTACCCCCTTCATTAACTTTATTATTAATAAGAAGAATAGCAGAATCAGGAGCTGGGACAGGATGAACAGTCTACCCTCCCTTATCGAGTAATATCTCACATAGAGGAGCATCAGTTGATTTAGCTATTTTTTCC…
N24	MT517251	ACTCTATACTTTATCTTCGGAATATGATCTGGAATAGTAGGATCAGCTATAAGATTAATTATCCGTATCGAATTAGGACAGCCTGGAAGATTTATTGGTAATGATCAAATTTATAATGTAATTGTAACAGCACATGCATTTGTAATAATTTTCTTTATAGTAATACCAATCATAATTGGAGGATTCGGTAATTGATTAGTCCCTTTAATAATTGGAGCACCTGATATAGCCTTCCCACGATTAAATAATATAAGATTCTGATTATTACCCCCTTCATTAACTTTATTATTAATAAGAAGAATAGCAGAATCAGGAGCTGGGACAGGATGAACAGTCTACCCTCCCTTATCGAGTAATATCTCACATAGAGGAGCATCAGTTGATTTAGCTATTTTTTCC…
N25	MT517252	ACTCTATACTTTATCTTCGGAATATGATCTGGAATAGTAGGATCAGCTATAAGATTAATTATCCGTATCGAATTAGGACAGCCTGGAAGATTTATTGGTAATGATCAAATTTATAATGTAATTGTAACAGCACATGCATTTGTAATAATTTTCTTTATAGTAATACCAATCATAATTGGAGGATTCGGTAATTGATTAGTCCCTTTAATAATTGGAGCACCTGATATAGCCTTCCCACGATTAAATAATATAAGATTCTGATTATTACCCCCTTCATTAACTTTATTATTAATAAGAAGAATAGCAGAATCAGGAGCTGGGACAGGATGAACAGTTTACCCTCCCTTATCGAGTAATATCTCACATAGAGGAGCATCAGTTGATTTAGCTATTTTTTCC…
N26	MT517253	ACTCTATACTTTATCTTCGGAATATGATCTGGAATAGTAGGATCAGCTATAAGATTAATTATCCGTATCGAATTAGGACAGCCGGGAAGATTTATTGGTAATGATCAAATTTATAATGTAATTGTAACAGCACATGCATTTGTAATAATTTTCTTTATAGTAATACCAATCATAATTGGAGGATTCGGTAATTGATTAGTCCCTTTAATAATTGGAGCACCTGATATAGCCTTCCCACGATTAAATAATATAAGATTCTGATTATTACCCCCTTCATTAACTTTATTATTAATAAGAAGAATAGCAGAATCAGGAGCTGGGACAGGATGAACAGTCTACCCTCCCTTATCGAGTAATATCTCACATAGAGGAGCATCAGTTGATTTAGCTATTTTTTCC…
N27	MT517254	ACTCTATACTTTATCTTCGGAATATGATCTGGAATAGTAGGATCAGCTATAAGATTAATTATCCGTATCGAATTAGGACAGCCTGGAAGATTTATTGGTAATGATCAAATTTATAATGTAATTGTAACAGCACATGCATTTGTAATAATTTTCTTTATAGTAATACCAATCATAATTGGAGGATTCGGTAATTGATTAGTCCCTTTAATAATTGGAGCACCTGATATAGCCTTCCCACGATTAAATAATATAAGATTCTGATTATTACCCCCTTCATTAACTTTATTATTAATAAGAAGAATAGCAGAATCAGGAGCTGGGACAGGATGAACAGTCTACCCTCCCTTATCGAGTAATATCTCACATAGAGGAGCATCAGTTGATTTAGCTATTTTTTCC…
N28	MT517255	ACTCTATACTTTATCTTCGGAATATGATCTGGAATAGTAGGATCAGCTATAAGATTAATTATCCGTATCGAATTAGGACAGCCTGGAAGATTTATTGGCAATGATCAAATTTATAATGTAATTGTAACAGCACATGCATTTGTAATAATTTTCTTTATAGTAATACCAATCATAATTGGAGGATTCGGTAATTGATTAGTCCCTTTAATAATTGGAGCACCTGATATAGCCTTCCCACGATTAAATAATATAAGATTCTGATTATTACCCCCTTCATTAACTTTATTATTAATAAGAAGAATAGCAGAATCAGGAGCTGGGACAGGATGAACAGTCTACCCCCCTTTATCGAGTAATATCTCACATAGAGGAGCATCAGTTGATTTAGCTATTTTTTCC…
N29	MT517256	ACTCTATACTTTATCTTCGGAATATGATCTGGAATAGTAGGATCAGCTATAAGATTAATTATCCGTATCGAATTAGGACAGCCTGGAAGATTTATTGGTAATGATCAAATTTATAATGTAATTGTAACAGCACATGCATTTGTAATAATTTTCTTTATAGTAATACCAATCATAATTGGAGGATTCGGTAATTGATTAATCCCTTTAATAATTGGAGCACCTGATATAGCCTTCCCACGATTAAATAATATAAGATTCTGATTATTACCCCCTTCATTAACTTTATTATTAATAAGAAGAATAGCAGAATCAGGAGCTGGGACAGGATGAACAGTCTACCCCCCCTTATCGAGTAATATCTCACATAGAGGAGCATCAGTTGATTTAGCTATTTTTTCC…
N30	MT517257	ACTCTATACTTTATCTTCGGAATATGATCTGGAATAGTAGGATCAGCTATAAGATTAATTATCCGTATCGAATTAGGACAGCCTGGAAGATTTATTGGTAATGATCAAATTTATAATGTAATTGTAACAGCACATGCATTTGTAATAATTTTCTTTATAGTAATACCAATCATAATTGGAGGATTCGGTAATTGATTAGTCCCTTTAATAATTGGAGCACCTGATATAGCCTTCCCACGATTAAATAATATAAGATTCTGATTATTACCCCCTTCATTAACTTTATTATTAATAAGAAGAATAGCAGAATCAGGAGCTGGGACAGGATGAACAGTCTACCCCCCCTTATCGAGTAATATCTCACATAGAGGAGCATCAGTTGATTTAGCTATTTTTTCC…
N32	MT517259	ACTCTATACTTTATCTTCGGAATATGATCTGGAATAGTAGGATCAGCTATAAGATTAATTATCCGTATCGAATTAGGACAGCCTGGAAGATTTATTGGTAATGATCAAATTTATAATGTAATTGTAACAGCACATGCATTTGTAATAATTTTCTTTATAGTAATACCAATCATAATTGGAGGATTCGGTAATTGATTAGTCCCTTTAATAATTGGAGCACCTGATATAGCCTTCCCACGATTAAATAATATAAGATTCTGATTATTACCCCCTTCATTAACTTTATTATTAATAAGAAGAATAGCAGAATCAGGAGCTGGGACAGGATGAACAGTCTATCCTCCCTTATCAAGTAATATCTCACATAGAGGAGCATCAGTTGATTTAGCTATTTTTTCC…
N33	MT517260	ACTCTATACTTTATCTTCGGAATATGATCTGGAATAGTAGGATCAGCTATAAGATTAATTATCCGTATCGAATTAGGACAACCTGGAAGATTTATTGGTAATGATCAAATTTATAATGTAATTGTAACAGCACATGCATTTGTAATAATTTTCTTTATAGTAATACCAATCATAATTGGAGGATTCGGTAATTGATTAGTCCCTTTAATAATTGGAGCACCTGATATAGCCTTCCCACGATTAAATAATATAAGATTCTGATTATTACCCCCTTCATTAACTTTATTATTAATAAGAAGAATAGCAGAATCAGGAGCTGGGACAGGATGAACAGTCTATCCCCCCTTATCGAGTAATATCTCACATAGAGGAGCATCAGTTGATTTAGCTATTTTTTCC…
N34	MT517261	ACTCTATACTTTATCTTCGGAATATGATCTGGAATAGTAGGATCAGCTATAAGATTAATTATCCGTATCGAATTAGGACAGCCTGGAAGATTTATTGGTAATGATCAAATTTATAATGTAATTGTAACAGCACATGCATTTGTAATAATTTTCTTTATAGTAATACCAATCATAATTGGAGGATTCGGTAATTGATTAGTCCCTTTAATAATTGGAGCACCTGATATAGCCTTCCCACGATTAAATAATATAAGATTCTGATTATTACCCCCTTCATTAACTTTATTATTAATAAGAAGAATAGCAGAATCAGGAGCTGGGACAGGATGAACAGTCTACCCTCCCTTATCGAGTAATATTTCACATAGAGGAGCATCAGTTGATTTAGCTATTTTTTCC…
N35	MT517262	ACTCTATACTTTATCTTCGGAATATGATCTGGAATAGTAGGATCAGCTATAAGATTAATTATCCGTATCGAATTAGGACAGCCTGGAAGATTTATTGGTAATGATCAAATTTATAATGTAATTGTAACAGCACATGCATTTGTAATAATTTTCTTTATAGTAATACCAATCATAATTGGAGGATTCGGTAATTGATTAGTCCCTTTAATAATTGGAGCACCTGATATAGCCTTCCCACGATTAAATAATATAAGATTCTGATTATTACCCCCTTCATTAACTTTATTATTAATAAGAAGAATAGCAGAATCAGGAGCTGGGACAGGATGAACAGTCTACCCCCCCTTATCGAGTAATATCTCACATAGAGGAGCATCAGTTGATTTAGCTATTTTTTCC…
N36	MT517263	ACTCTATACTTTATCTTCGGAATATGATCTGGAATAGTAGGATCAGCTATAAGATTAATTATCCGTATCGAATTAGGACAGCCTGGAAGATTTATTGGTAATGATCAAATTTATAATGTAATTGTAACAGCACATGCATTTGTAATAATTTTCTTTATAGTAATACCAATCATAATTGGAGGATTCGGTAATTGATTAGTCCCTTTAATAATTGGAGCACCTGATATAGCCTTCCCACGATTAAATAATATAAGATTCTGATTATTACCCCCTTCATTAACTTTATTATTAATAAGAAGAATAGCAGAATCAGGAGCTGGGACAGGATGAACAGTCTACCCTCCCTTATCGAGTAATATCTCACATAGAGGAGCATCAGTTGATTTAGCTATTTTTTCC…
N37	MT517264	ACTCTATACTTTATCTTCGGAATATGGTCTGGAATAGTAGGATCAGCTATAAGATTAATTATCCGTATCGAATTAGGACAGCCTGGAAGATTTATTGGTAATGATCAAATTTATAATGTAATTGTAACAGCACATGCATTTGTAATAATTTTCTTTATAGTAATACCAATCATAATTGGAGGATTCGGTAATTGATTAGTCCCTTTAATAATTGGAGCACCTGATATAGCCTTCCCACGATTAAATAATATAAGATTCTGATTATTACCCCCTTCATTAACTTTATTATTAATAAGAAGAATAGCAGAATCAGGAGCTGGGACAGGATGAACAGTCTACCCTCCCTTATCGAGTAATATCTCACATAGAGGAGCATCAGTTGATTTAGCTATTTTTTCC…
N38	MT517265	ACTCTATACTTTATCTTCGGAATATGATCTGGAATAGTAGGATCAGCTATAAGATTAATTATCCGTATCGAATTAGGACAGCCTGGAAGATTTATTGGTAATGATCAAATTTATAATGTAATTGTAACAGCACATGCATTTGTAATAATTTTCTTTATAGTAATACCAATCATAATTGGAGGATTCGGTAATTGATTAGTCCCTTTAATAATTGGAGCACCTGATATAGCCTTCCCACGATTAAATAATATAAGATTCTGATTATTACCCCCTTCATTAACTTTATTATTAATAAGAAGAATAGCAGAATCAGGAGCTGGGACAGGATGAACAGTCTACCCTCCCTTATCGAGTAATATCTCACATAGAGGAGCATCAGTTGATTTAGCTATTTTTTCC…
N39	MT517266	ACTCTATACTTTATCTTCGGAATATGATCTGGAATAGTAGGATCAGCTATAAGATTAATTATCCGTATCGAATTAGGACAGCCTGGAAGATTTATTGGTAATGATCAAATTTATAATGTAATTGTAACAGCACATGCATTTGTAATAATTTTCTTTATAGTAATACCAATCATAATTGGAGGATTCGGTAATTGATTAGTCCCTTTAATAATTGGAGCACCTGATATAGCCTTCCCACGATTAAATAATATAAGATTCTGATTATTACCCCCTTCATTAACTTTATTATTAATAAGAAGAATAGCAGAATCAGGAGCTGGGACAGGATGAACAGTCTACCCTCCCTTATCAAGTAATATCTCACATAGAGGAGCATCAGTTGATTTAGCTATTTTTTCC…
N40	MT517267	ACTCTATACTTTATCTTCGGAATATGATCTGGAATAGTAGGATCAGCTATAAGATTAATTATCCGTATCGAATTAGGACAGCCTGGAAGATTTATTGGTAATGATCAAATTTATAATGTAATTGTAACAGCACATGCATTTGTAATAATTTTCTTTATAGTAATACCAATCATAATTGGAGGATTCGGTAATTGATTAGTCCCTTTAATAATTGGAGCACCTGATATAGCCTTCCCACGATTAAATAATATAAGATTCTGATTATTACCCCCTTCATTAACTTTATTATTAATAAGAAGAATAGCAGAATCAGGAGCTGGGACAGGATGAACAGTCTACCCTCCCTTATCGAGTAATATCTCACATAGAGGAGCATCAGTTGATTTAGCTATTTTTTCC…
N41	MT517268	ACTCTATACTTTATCTTCGGAATATGATCTGGAATAGTAGGATCAGCTATAAGATTAATTATCCGTATCGAATTAGGACAGCCTGGAAGATTTATTGGTAATGATCAAATTTACAATGTAATTGTAACAGCACATGCATTTGTAATAATTTTCTTTATAGTAATACCAATCATAATTGGAGGATTCGGTAATTGATTAGTCCCTTTAATAATTGGAGCACCTGATATAGCCTTCCCACGATTAAATAATATAAGATTCTGATTATTACCCCCTTCATTAACTTTATTATTAATAAGAAGAATAGCAGAATCAGGAGCTGGGACAGGATGAACAGTATACCCTCCCTTATCGAGTAATATCTCACATAGAGGAGCATCAGTTGATTTAGCTATTTTTTCC…
N43	MT517270	ACTCTATACTTTATCTTCGGAATATGATCTGGAATAGTAGGATCAGCTATAAGATTAATTATCCGTATCGAATTAGGACAGCCTGGAAGATTTATTGGTAATGATCAAATTTACAATGTAATTGTAACAGCACATGCATTTGTAATAATTTTCTTTATAGTAATACCAATCATAATTGGAGGATTCGGTAATTGATTAGTCCCTTTAATAATTGGAGCACCTGATATAGCCTTCCCACGATTAAATAATATAAGATTCTGATTATTACCCCCTTCATTAACTTTATTATTAATAAGAAGAATAGCAGAATCAGGAGCTGGGACAGGATGAACAGTCTACCCTCCCTTATCGAGTAATATCTCACATAGAGGAGCATCAGTTGATTTAGCTATTTTTTCC…
N45	MT517272	ACTCTATACTTTATCTTCGGAATATGATCTGGAATAGTAGGATCAGCTATAAGATTAATTATCCGTATCGAATTAGGACAGCCTGGAAGATTTATTGGTAATGATCAAATTTATAATGTAATTGTAACAGCACATGCATTTGTAATAATTTTCTTTATAGTAATACCAATCATAATTGGAGGATTCGGTAATTGATTAGTCCCTTTAATAATTGGAGCACCTGATATAGCCTTCCCACGATTAAATAATATAAGATTCTGATTATTACCCCCTTCATTAACTTTATTATTAATAAGAAGAATAGCAGAATCAGGAGCTGGGACAGGATGAACAGTCTACCCTCCCTTATCGAGTAATATCTCACATAGAGGAGCATCAGTTGATTTAGCTATTTTTTCC…
N46	MT517273	ACTCTATACTTTATCTTCGGAATATGATCTGGAATAGTAGGATCAGCTATAAGATTAATTATCCGTATCGAATTAGGACAGCCTGGAAGATTTATTGGTAATGATCAAATTTATAATGTAATTGTAACAGCACATGCATTTGTAATAATTTTCTTTATAGTAATACCAATCATAATTGGAGGATTCGGTAATTGATTAGTCCCTTTAATAATTGGAGCACCTGATATAGCCTTCCCACGATTAAATAATATAAGATTCTGATTATTACCCCCTTCATTAACTTTATTATTAATAAGAAGAATAGCAGAATCGGGAGCTGGGACAGGATGAACAGTCTACCCTCCCTTATCGAGTAATATCTCACATAGAGGAGCATCAGTTGATTTAGCTATTTTTTCC…
N47	MT517274	ACTCTATACTTTATCTTCGGGATATGATCTGGAATAGTAGGATCAGCTATAAGATTAATTATCCGTATCGAATTAGGACAGCCTGGAAGATTTATTGGTAATGATCAAATTTATAATGTAATTGTAACAGCACATGCATTTGTAATAATTTTCTTTATAGTAATACCAATCATAATTGGAGGATTCGGTAATTGATTAGTCCCTTTAATAATTGGAGCACCTGATATAGCCTTCCCACGATTAAATAATATAAGATTCTGATTATTACCCCCTTCATTAACTTTATTATTAATAAGAAGAATAGCAGAATCAGGAGCTGGGACAGGATGAACAGTCTATCCCCCCTTATCGAGTAATATCTCACATAGAGGAGCATCAGTTGATTTAGCTATTTTTTCC…

## Sheet: Distribution of COI 
Geographical distribution of mtDNA COI haplotypes of H. halys detected from each country in the current study. The COI haplotypes are named in uppercase letters. The haplotype names with a prefix ‘H’ represent the previously reported haplotypes while those with ‘N’ are the newly detected haplotypes identified in this study. The numbers of individuals from each country and for each haplotype are l…
	Native countries		Group B			Group A
	China	Japan	Austria	Serbia	Slovenia	Chile	Georgia	Hungary	Italy	Romania	Turkey	the USA
H1	26		4	5	11	30	31	86	23	23	11	24
H2	5
H3	9		8	5	4	1		5	1
H8			2
H15	1
H22	13
H23		9
H27		2
H33	21
H39		2
H40		1
H41		3						1
H43		2
H45		11
H48			2
N1	1
N3	1
N4	1
N5	4
N6	4
N7	1
N8	1
N9	1
N12		1
N13		1
N14		1
N15		1
N16		1
N21		1
N22		10
N24		1
N25		1
N26		1
N27		1
N28	1
N29	1
N30	1
N32	1
N33	1
N34		1
N35		1
N36		1
N37		1
N38		1
N39		2
N40		6
N41		2
N43		2
N45		1
N46		1
N47					1
Total	94	69	16	10	16	31	31	92	24	23	11	24

## Sheet: COII haplotypes
Haplotype	Accession	Sequence
h1	KF112000	TCATTAATAGAACAACTAACATTTTTTCATGATCACACAGTTATAATTTTATCAATAATTACAATCATAGTTGCATATATTATAATAACTTTAACAAAAAACAAATATATTAATCGATATCTACTAGAAGGTCAAACAATTGAATTAATTTGAACAGTTATACCAGCAATCACATTAATCTTTATTGCATTACCATCACTACGATTATTATATATGATTGATGAAATTAACAATCCATCAATTACATTAAAAGTAATTGGACATCAATGATACTGAAGATATGAATATTCAGATTTTAGAAATACTGAATTTGATTCATATATAAAGCCAGTTAATGAAATAAATAAAAATGAAATTCGCCTTCTTGATGTAGATAATCGTACTGTTATTCCAATAAAT…
h3	KF112002	TCATTAATAGAACAACTAACATTTTTTCATGATCACACAGTTATAATTTTATCAATAATTACAATCATAGTTGCATATATTATAATAACTTTAACAAAAAACAAATATATTAATCGATATCTACTAGAAGGTCAAACAATTGAATTAATTTGAACAGTTATACCAGCAATCACATTAATCTTTATTGCATTACCATCACTACGATTATTATATATGATTGATGAAATTAACAATCCATCAATTACATTAAAAGTAATTGGACATCAATGATACTGAAGATATGAATATTCAGATTTTAGAAATACTGAATTTGATTCATATATAAAACCAGTTAATGAAATAAATAAAAATGAAATTCGCCTTCTTGATGTAGATAATCGTACTGTTATTCCAATAAAT…
h4	KF112003	TCATTAATAGAACAACTAACATTTTTTCATGATCACACAGTTATAATTTTATCAATAATTACAATCATAGTTGCATATATTATAATAACTTTAACAAAAAACAAATATATTAATCGATATCTACTAGAAGGTCAAACAATTGAATTAATTTGAACAGTTATACCAGCAATCACATTAATCTTTATTGCATTACCATCACTACGATTATTATATATGATTGATGAAATTAACAATCCATCAATTACATTAAAAGTAATTGGACATCAATGATACTGAAGATATGAATATTCAGATTTTAGAAATACTGAATTTGATTCATATATAAAACCAGTTAATGAAATAAATAAAAATGAAATTCGCCTTCTTGATGTAGATAATCGTACTGTTATTCCAATAAAT…
h5	KF112004	TCATTAATAGAACAACTAACATTTTTTCATGATCACACAGTTATAATTTTATCAATAATTACAATCATAGTTGCATATATTATAATAACTTTAACAAAAAACAAATATATTAATCGATATCTACTAGAAGGTCAAACAATTGAATTAATTTGAACAGTTATACCAGCAATTACATTAATCTTTATTGCATTACCATCACTACGATTATTATATATGATTGATGAAATTAACAATCCATCAATTACATTAAAAGTAATTGGACATCAATGATACTGAAGATATGAATATTCAGATTTTAGAAATACTGAATTTGATTCATATATAAAGCCAGTTAATGAAATAAATAAAAATGAAATTCGCCTTCTTGATGTAGATAATCGTACTGTTATTCCAATAAAT…
h11	KF112010	TCATTAATAGAACAACTAACATTTTTTCATGATCACACAGTTATAATTTTATCAATAATTACAATCATAGTTGCATATATTATAATAACTTTAACAAAAAACAAATATATTAATCGATATCTACTAGAAGGTCAAACAATTGAATTAATTTGAACAGTTATACCAGCAATCACATTAATCTTTATTGCATTACCATCACTACGATTATTATATATGATTGATGAAATTAACAATCCATCAATTACATTAAAAGTAATTGGACATCAATGATACTGAAGATATGAATATTCAGATTTTAGAAATACTGAATTTGATTCATATATAAAACCAGTTAATGAAATAAATAAAAATGAAATTCGCCTTCTTGATGTAGATAATCGTACTGTTATTCCAATAAAT…
h15	KF112014	TCATTAATAGAACAACTAACATTTTTTCATGATCACACAGTTATAATTTTATCAATAATTACAATCATAGTTGCATATATTATAATAACTTTAACAAAAAACAAATATATTAATCGATATCTACTAGAAGGTCAAACAATTGAATTAATTTGAACAGTTATACCAGCAATCACATTAATCTTTATTGCATTACCATCACTACGATTATTATATATGATTGATGAAATTAACAATCCATCAATTACATTAAAAGTAATTGGACATCAATGATACTGAAGATATGAATATTCAGATTTTAGAAATACTGAATTTGATTCATATATAAAGCCAGTTAATGAGATAAATAAAAATGAAATTCGCCTTCTTGATGTAGATAATCGTACTGTTATTCCAATAAAT…
h16	KF112015	TCATTAATAGAACAACTAACATTTTTTCACGATCACACAGTTATAATTTTATCAATAATTACAATCATAGTTGCATATATTATAATAACTTTAACAAAAAACAAATATATTAATCGATATCTACTAGAAGGTCAAACAATTGAATTAATTTGAACAGTTATACCAGCAATCACATTAATCTTTATTGCATTACCATCACTACGATTATTATATATGATTGATGAAATTAACAATCCATCAATTACATTAAAAGTAATTGGACATCAATGATACTGAAGATATGAATATTCGGATTTTAGAAATACTGAATTTGATTCATATATAAAACCAGTTAATGAAATAAATAAAAATGAAATTCGCCTTCTTGATGTAGATAATCGTACTGTTATTCCAATAAAT…
h17	KF112016	TCATTAATAGAACAACTAACATTTTTTCACGATCACACAGTTATAATTTTATCAATAATTACAATCATAGTTGTATATATTATAATAACTTTAACAAAAAACAAATATATTAATCGATATCTACTAGAAGGTCAAACAATTGAATTAATTTGAACAGTTATACCAGCAATCACATTAATCTTTATTGCATTACCATCACTACGATTATTATATATGATTGATGAAATTAACAATCCATCAATTACATTAAAAGTAATTGGACATCAATGATACTGAAGATATGAATATTCGGATTTTAGAAATACTGAATTTGATTCATATATAAAACCAGTTAATGAAATAAATAAAAATGAAATTCGCCTTCTTGATGTAGATAATCGTACTGTTATTCCAATAAAT…
h18	KF112017	TCATTAATAGAACAACTAACATTTTTTCATGATCACACAGTTATAATTTTATCAATAATTACAATCATAGTTGCATATATTATAATAACTTTAACAAAAAACAAATATATTAATCGATATCTACTAGAAGGTCAAACAATTGAATTAATTTGAACAGTTATACCAGCAATCACATTAATCTTTATTGCATTACCATCACTACGATTATTATATATGATTGATGAAATTAACAATCCATCAATTACATTAAAAGTAATTGGACATCAATGATACTGAAGATATGAATATTCGGATTTTAGAAATACTGAATTTGATTCATATATAAAACCAGTTAATGAAATAAATAAAAATGAAATTCGCCTTCTTGATGTAGATAATCGTACTGTTATTCCAATAAAT…
n1	MT490838	TCATTAATAGAACAACTAACATTTTTTCATGATCACACAGTTATAATTTTATCAATAATTACAATCATAGTTGCATATATTATAATAACTTTAACAAAAAACAAATATATTAATCGATATTTACTAGAAGGTCAAACAATTGAATTAATTTGAACAGTTATACCAGCAATCACATTAATCTTTATTGCATTACCATCACTACGATTATTATATATGATTGATGAAATTAACAATCCATCAATCACATTAAAAGTAATTGGACATCAATGATACTGAAGATATGAATATTCAGATTTTAGAAATACTGAATTTGATTCATATATAAAGCCAGTTAATGAAATAAATAAAAATGAAATTCGCCTTCTTGATGTAGATAATCGTACTGTTATTCCAATAAAT…
n2	MT490839	TCATTAATAGAACAACTAACATTTTTTCATGACCACACAGTTATAATTTTATCAATAATTACAATCATAGTTGCATATATTATAATAACTTTAACAAAAAACAAATATATTAATCGATATCTACTAGAAGGTCAAACAATTGAATTAATTTGAACAGTTATACCAGCAATCACATTAATCTTTATTGCATTACCATCACTACGATTATTATATATGATTGATGAAATTAACAATCCATCAATTACATTAAAAGTAATTGGACATCAATGATACTGAAGATATGAATATTCGGATTTTAGAAATACTGAATTTGATTCATATATAAAACCAGTTAATGAAATAAATAAAAATGAAATTCGCCTTCTTGATGTAGATAATCGTACTGTTATTCCAATAAAT…
n3	MT490840	TCATTAATAGAACAACTAACATTTTTTCATGATCACACAGTTATAATTTTATCAATAATTACAATCATAGTCGCATATATTATAATAACTTTAACAAAAAACAAATACATTAATCGATATCTACTAGAAGGTCAAACAATTGAATTAATTTGAACAGTTATACCAGCAATCACATTAATCTTTATTGCATTACCATCACTACGATTATTATATATGATTGATGAAATTAACAATCCATCAATTACATTAAAAGTAATTGGACATCAATGATACTGAAGATATGAATATTCAGATTTTAGAAATACTGAATTTGATTCATATATAAAACCAGTTAATGAAATAAATAAAAATGAAATTCGCCTTCTTGATGTAGATAATCGTACTGTTATTCCAATAAAT…
n4	MT490841	TCATTAATAGAACAACTAACATTTTTTCATGACCACACAGTTATAATTTTATCAATAATTACAATCATAGTTGCATATATTATAATAACTTTAACAAAAAACAAATACATTAATCGATATCTACTAGAAGGTCAAACAATTGAATTAATTTGAACAGTTATACCAGCAATCACATTAATCTTTATTGCATTACCATCACTACGATTATTATATATGATTGATGAAATTAACAATCCATCAATTACATTAAAAGTAATTGGACATCAATGATACTGAAGATATGAATATTCAGATTTTAGAAATACTGAATTTGATTCATATATAAAACCAGTTAATGAAATAAATAAAAATGAAATTCGCCTTCTTGATGTAGATAATCGTACTGTTATTCCAATAAAT…
n5	MT490842	TCATTAATAGAACAACTAACATTTTTTCATGATCACACAGTTATAATTTTATCAATAATTACAATCATAGTTGCATATATTATAATAACTTTAACAAAAAACAAATACATTAATCGATATCTACTAGAAGGTCAAACAATTGAATTAATTTGAACAGTTATACCAGCAATCACATTAATCTTTATTGCATTACCATCACTACGATTATTATATATGATTGATGAAATTAACAATCCATCAATTACATTAAAAGTAATTGGACATCAATGATACTGAAGATATGAATATTCAGATTTTAGAAATACTGAATTTGATTCATATATAAAACCAGTTAATGAAATAAATAAAAATGAAATTCGCCTTCTTGATGTAGATAATCGTACTGTTATTCCAATAAAT…
n6	MT490843	TCATTAATAGAACAACTAACATTTTTTCATGATCACACAGTTATAATTTTATCAATAATTACAATCATAGTTGCATATATTATAATAACTTTAACAAAAAACAAATATATTAATCGATATCTACTAGAAGGTCAAACAATTGAATTAATTTGAACAGTTATACCAGCAATCACATTAATCTTTATTGCATTACCATCACTACGATTATTATATATGATTGATGAAATTAACAATCCATCAATTACATTAAAAGTAATTGGACATCAATGATACTGAAGATATGAATATTCAGATTTTAGAAATACTGAATTTGATTCATATATAAAACCAGTTAATGAAATAAATAAAAATGAAATTCGCCTTCTTGATGTAGATAATCGTACTGTTATTCCAATAAAT…
n8	MT490845	TCATTAATAGAACAACTAACATTTTTTCATGATCACACAGTTATAATTTTATCAATAATTACAATTATAGTTGCATATATTATAATAACTTTAACAAAAAACAAATATATTAATCGATATCTACTAGAAGGTCAAACAATTGAATTAATTTGAACAGTTATACCAGCAATCACATTAATCTTTATTGCATTACCATCACTACGATTATTATATATGATTGATGAAATTAACAATCCATCAATTACATTAAAAGTAATTGGACATCAATGATACTGAAGATATGAATATTCAGATTTTAGAAATACTGAATTTGATTCATATATAAAACCAGTTAATGAAATAAATAAAAATGAAATTCGCCTTCTTGATGTAGATAATCGTACTGTTATTCCAATAAAT…
n10	MT490847	TCATTAATAGAACAACTAACATTTTTTCATGATCACACAGTTATAATTTTATCAATAATTACGATCATAGTTGCATATATTATAATAACTTTAACAAAAAACAAATATATTAATCGATATCTACTAGAAGGTCAAACAATTGAATTAATTTGAACAGTTATACCAGCAATCACATTAATCTTTATTGCATTACCATCACTACGATTATTATATATGATTGATGAAATTAACAATCCATCAATTACATTAAAAGTAATTGGACATCAATGATACTGAAGATATGAATATTCAGATTTTAGAAATACTGAATTTGATTCATATATAAAACCAGTTAATGAAATAAATAAAAATGAAATTCGCCTTCTTGATGTAGATAATCGTACTGTTATTCCAATAAAT…
n11	MT490848	TCATTAATAGAACAACTAACATTTTTTCATGATCACACAGTTATAATTTTATCAATAATTACAATCATAGTTGCATATATTATAATAACTTTAACAAAAAACAAATATATTAATCGATATCTACTAGAAGGCCAAACAATTGAATTAATTTGAACAGTTATACCAGCAATCACATTAATCTTTATTGCATTACCATCACTACGATTATTATATATGATTGATGAAATTAACAATCCATCAATTACATTAAAAGTAATTGGACATCAATGATACTGAAGATATGAATATTCAGATTTTAGAAATACTGAATTTGATTCATATATAAAACCAGTTAATGAAATAAATAAAAATGAAATTCGCCTTCTTGATGTAGATAATCGTACTGTTATTCCAATAAAT…
n12	MT490849	TCATTAATAGAACAACTAACATTTTTTCATGATCACACAGTTATAATTTTATCAATAATTACAATCATAGTTGCATATATTATAATAACTTTAACAAAAAACAAATATATTAATCGATATCTACTAGAAGGTCAAACAATTGAATTAATTTGAACAGTTATACCAGCAATTACATTAATCTTTATTGCATTACCATCACTACGATTATTATATATGATTGATGAAATTAACAATCCATCAATTACATTAAAAGTAATTGGACATCAATGATACTGAAGATATGAATATTCAGATTTTAGAAATACTGAATTTGATTCATATATAAAACCAGTTAATGAAATAAATAAAAATGAAATTCGCCTTCTTGATGTAGATAATCGTACTGTTATTCCAATAAAT…
n13	MT490850	TCATTAATAGAACAACTAACATTTTTTCATGATCACACAGTTATAATTTTATCAATAATTACAATCATAGTTGCATATATTATAATAACTTTAACAAAAAACAAATATATTAATCGATACCTACTAGAAGGTCAAACAATTGAATTAATTTGAACAGTTATACCAGCAATCACATTAATCTTTATTGCATTACCATCACTACGATTATTATATATGATTGATGAAATTAACAATCCATCAATTACATTAAAAGTAATTGGACATCAATGATACTGAAGATATGAATATTCAGATTTTAGAAATACTGAATTTGATTCATATATAAAACCAGTTAATGAAATAAATAAAAATGAAATTCGCCTTCTTGATGTAGATAATCGTACTGTTATTCCAATAAAT…
n14	MT490851	TCATTAATAGAACAACTAACATTTTTTCATGATCACACAGTTATAATTTTATCAATAATTACAATCATAGTTGCATATATTATAATAACTTTAACAAAAAACAAATATATTAATCGATATCTACTAGAAGGTCAAACAATTGAATTAATTTGAACAGTTATACCAGCAATCACATTAATCTTTATTGCATTACCATCACTACGATTATTATATATGATTGATGAAATTAACAATCCATCAATTACATTAAAAGTAATTGGACATCAATGATACTGAAGATATGAATATTCAGATTTTAGAAATACTGAATTTGATTCATATATAAAACCAGTTAATGAAATAAATAAAAATGAAATTCGCCTTCTTGATGTAGATAATCGTACTGTTATCCCAATAAAT…
n15	MT490852	TCATTAATAGAACAACTAACATTTTTTCATGATCACACAGTTATAATTTTATCAATAATTACAATCATAGTTGCATATATTATAATAACTTTAACAAAAAACAAATATATTAATCGATATCTACTAGAAGGTCAAACAATTGAGTTAATTTGAACAGTTATACCAGCAATCACATTAATCTTTATTGCATTACCATCACTACGATTATTATATATGATTGATGAAATTAACAATCCATCAATTACATTAAAAGTAATTGGACATCAATGATACTGAAGATATGAATATTCAGATTTTAGAAATACTGAATTTGATTCATATATAAAGCCAGTTAATGAAATAAATAAAAATGAAATTCGCCTTCTTGATGTAGATAATCGTACTGTTATTCCAATAAAT…
n16	MT490853	TCATTAATAGAACAACTAACATTTTTTCATGATCACACAGTTATAATTTTATCAATAATTACAATCATAGTTGCATATATTATAATAACTTTAACAAAAAACAAATATATTAATCGATATCTACTAGAAGGTCAAACAATTGAATTAATTTGAACAGTTATACCAGCAATCACATTAATCTTTATTGCATTACCATCACTACGATTATTATATATGATTGATGAAATTAACAATCCATCAATTACATTAAAAGTAATTGGACATCAATGATACTGAAGATATGAATATTCAGATTTTAGAAATACTGAATTTGATTCATATATAAAGCCAGTTAATGAAATAAATAAAAATGAAATTCGCCTTCTTGATGTAGATAATCGTACTGTTATTCCAATAAAT…
n17	MT490854	TCATTAATAGAACAACTAACATTTTTTCATGATCACACAGTTATAATTTTATCAATAATTACAATCATAGTTGCATATATTATAATAACTTTAACAAAAAACAAATATATTAATCGATATCTACTAGAAGGTCAAACAATTGAATTAATTTGAACAGTCATACCAGCAATCACATTAATCTTTATTGCATTACCATCACTACGATTATTATATATGATTGATGAAATTAACAATCCATCAATTACATTAAAAGTAATTGGACATCAATGATACTGAAGATATGAATATTCAGATTTTAGAAATACTGAATTTGATTCATATATAAAACCAGTTAATGAAATAAATAAAAATGAAATTCGCCTTCTTGATGTAGATAATCGTACTGTTATTCCAATAAAT…
n18	MT490855	TCATTAATAGAACAACTAACATTTTTTCATGATCACACAGTTATAATTTTATCAATAATTACAATCATAGTTGCATATATTATAATAACTTTAACAAAAAACAAATATATTAATCGATATCTACTAGAAGGTCAAACAATTGAATTAATTTGAACAGTTATACCAGCAATCACATTAATCTTTATTGCATTACCATCACTACGATTATTATATATAATTGATGAAATTAACAATCCATCAATTACATTAAAAGTAATTGGACATCAATGATACTGAAGATATGAATATTCAGATTTTAGAAATACTGAATTTGATTCATATATAAAACCAGTTAATGAAATAAATAAAAATGAAATTCGCCTTCTTGATGTAGATAATCGTACTGTTATTCCAATAAAT…
n19	MT490856	TCATTAATAGAACAACTAACATTTTTTCATGATCACACAGTTATAATTTTATCAATAATTACAATCATAGTTGCATATATTATAATAACTTTAACAAAAAACAAATATATTAATCGATATCTACTAGAAGGTCAAACAATTGAATTAATTTGAACAGTTATACCAGCAATCACATTAATCTTTATTGCATTACCATCACTACGATTATTATATATGATTGATGAAATTAACAATCCATCAATTACATTAAAAGTAATTGGACATCAATGATACTGAAGATATGAATATTCAGATTTTAGAAATACTGAATTTGATTCATATATAAAACCAGTTAATGAAATAAATAAAAATGAAATTCGCCTTCTTGATGTAGATAATCGTACTGTTATTCCAATAAAT…
n20	MT490857	TCATTAATAGAACAACTAACATTTTTTCATGATCACACAGTTATAATTTTATCAATAATTACAATCATAGTTGCATATATTATAATAACTTTAACAAAAAACAGATATATTAATCGATATCTACTAGAAGGTCAAACAATTGAATTAATTTGAACAGTTATACCAGCAATCACATTAATCTTTATTGCATTACCATCACTACGATTATTATATATGATTGATGAAATTAACAATCCATCAATTACATTAAAAGTAATTGGACATCAATGATACTGAAGATATGAATATTCAGATTTTAGAAATACTGAATTTGATTCATATATAAAACCAGTTAATGAAATAAATAAAAATGAAATTCGCCTTCTTGATGTAGATAATCGTACTGTTATTCCAATAAAT…
n22	MT490859	TCATTAATAGAACAACTAACATTTTTTCATGATCACACAGTTATAATTTTATCAATAATTACAATCATAGTTACATATATTATAATAACTTTAACAAAAAACAAATATATTAATCGATATCTACTAGAAGGTCAAACAATTGAATTAATTTGAACAGTTATACCAGCAATCACATTAATCTTTATTGCATTACCATCACTACGATTATTATATATGATTGATGAAATTAACAATCCATCAATTACATTAAAAGTAATTGGACATCAATGATACTGAAGATATGAATATTCAGATTTTAGAAATACTGAATTTGATTCATATATAAAACCAGTTAATGAAATAAATAAAAATGAAATTCGCCTTCTTGATGTAGATAATCGTACTGTTATTCCAATAAAT…
n23	MT490860	TCATTAATAGAACAACTAACATTTTTTCATGATCACACAGTTATAATTTTATCAATAATTACAATCATAGTTGCATATATTATAATAACTTTAACAAAAAACAAATATATTAATCGATATCTACTAGAAGGTCAAACAATTGAATTAATTTGAACAGTTATACCAGCAATCACATTAATCTTTATTGCATTACCATCACTACGATTATTATATATGATTGATGAAATTAACAATCCATCAATTACATTAAAAGTAATTGGACATCAATGATACTGAAGATATGAATATTCAGATTTTAGAAATACTGAATTTGATTCATATATAAAACCAGTTAATGAAATAAATAAAAATGAAATTCGCCTTCTTGATGTAGATAATCATACTGTTATTCCAATAAAT…

## Sheet: Distribution of COII
Geographical distribution of mtDNA COII haplotypes of H. halys detected in the current study. The COII haplotypes are named in lowercase letters. The haplotype names with a prefix ‘h’ represent the previously reported haplotypes while those with ‘n’ represent the newly detected haplotypes in this study. The numbers of individuals from each country and for each haplotype are listed in the table.
	Native countries		Group B			Group A
	China	Japan	Austria	Serbia	Slovenia	Chile	Georgia	Hungary	Italy	Romania	Turkey	the USA
h1	26		3	4	10	30	33	85	26	23	13	25
h3	46		10	5	5	1		4	2
h4	5
h5	3
h11		56	2
h15		1						1
h16		1
h17		1
h18		3
n1	1
n2		1
n3	2
n4	1
n5	3
n6	1
n8		1
n10	1
n11		1
n12		1
n13		2
n14		1
n15	1
n16	1
n17	2
n18	2
n19	1
n20	1
n22	1
n23	1
Total	99	69	15	9	15	31	33	90	28	23	13	25

## Sheet: COICOII combined haplotypes
H1h1	ACTCTATACTTTATCTTCGGAATATGATCTGGAATAGTAGGATCAGCTATAAGATTAATTATCCGTATCGAATTAGGACAGCCTGGAAGATTTATTGGTAATGATCAAATTTATAATGTAATTGTAACAGCACATGCATTTGTAATAATTTTCTTTATAGTAATACCAATCATAATTGGAGGATTCGGTAATTGATTAGTCCCTTTAATAATTGGAGCACCTGATATAGCCTTCCCACGATTAAATAATATAAGATTCTGATTATTACCCCCTTCATTAACTTTATTATTAATAAGAAGAATAGCAGAATCAGGAGCTGGGACAGGATGAACAGTCTATCCCCCCTTATCAAGTAATATCTCACATAGAGGAGCATCAGTTGATTTAGCTATTTTTTCC…
H1n1	ACTCTATACTTTATCTTCGGAATATGATCTGGAATAGTAGGATCAGCTATAAGATTAATTATCCGTATCGAATTAGGACAGCCTGGAAGATTTATTGGTAATGATCAAATTTATAATGTAATTGTAACAGCACATGCATTTGTAATAATTTTCTTTATAGTAATACCAATCATAATTGGAGGATTCGGTAATTGATTAGTCCCTTTAATAATTGGAGCACCTGATATAGCCTTCCCACGATTAAATAATATAAGATTCTGATTATTACCCCCTTCATTAACTTTATTATTAATAAGAAGAATAGCAGAATCAGGAGCTGGGACAGGATGAACAGTCTATCCCCCCTTATCAAGTAATATCTCACATAGAGGAGCATCAGTTGATTTAGCTATTTTTTCC…
H2h4	ACTCTATACTTTATCTTCGGAATATGATCTGGAATAGTAGGATCAGCTATAAGATTAATTATCCGTATCGAATTAGGACAGCCTGGAAGATTTATTGGTAATGATCAAATTTATAATGTAATTGTAACAGCACATGCATTTGTAATAATTTTCTTTATAGTAATACCAATCATAATTGGAGGATTCGGTAATTGATTAGTCCCTTTAATAATTGGAGCACCTGATATAGCCTTCCCACGATTAAATAATATAAGATTCTGATTATTACCCCCTTCATTAACTTTATTATTAATAAGAAGAATAGCAGAATCAGGAGCTGGGACAGGATGAACAGTCTACCCCCCTTTATCGAGTAATATCTCACATAGAGGAGCATCAGTTGATTTAGCTATTTTTTCC…
H3h3	ACTCTATACTTTATCTTCGGAATATGATCTGGAATAGTAGGATCAGCTATAAGATTAATTATCCGTATCGAATTAGGACAGCCTGGAAGATTTATTGGTAATGATCAAATTTATAATGTAATTGTAACAGCACATGCATTTGTAATAATTTTCTTTATAGTAATACCAATCATAATTGGAGGATTCGGTAATTGATTAGTCCCTTTAATAATTGGAGCACCTGATATAGCCTTCCCACGATTAAATAATATAAGATTCTGATTATTACCCCCTTCATTAACTTTATTATTAATAAGAAGAATAGCAGAATCAGGAGCTGGGACAGGATGAACAGTCTATCCCCCCTTATCGAGTAATATCTCACATAGAGGAGCATCAGTTGATTTAGCTATTTTTTCC…
H3h5	ACTCTATACTTTATCTTCGGAATATGATCTGGAATAGTAGGATCAGCTATAAGATTAATTATCCGTATCGAATTAGGACAGCCTGGAAGATTTATTGGTAATGATCAAATTTATAATGTAATTGTAACAGCACATGCATTTGTAATAATTTTCTTTATAGTAATACCAATCATAATTGGAGGATTCGGTAATTGATTAGTCCCTTTAATAATTGGAGCACCTGATATAGCCTTCCCACGATTAAATAATATAAGATTCTGATTATTACCCCCTTCATTAACTTTATTATTAATAAGAAGAATAGCAGAATCAGGAGCTGGGACAGGATGAACAGTCTATCCCCCCTTATCGAGTAATATCTCACATAGAGGAGCATCAGTTGATTTAGCTATTTTTTCC…
H3n20	ACTCTATACTTTATCTTCGGAATATGATCTGGAATAGTAGGATCAGCTATAAGATTAATTATCCGTATCGAATTAGGACAGCCTGGAAGATTTATTGGTAATGATCAAATTTATAATGTAATTGTAACAGCACATGCATTTGTAATAATTTTCTTTATAGTAATACCAATCATAATTGGAGGATTCGGTAATTGATTAGTCCCTTTAATAATTGGAGCACCTGATATAGCCTTCCCACGATTAAATAATATAAGATTCTGATTATTACCCCCTTCATTAACTTTATTATTAATAAGAAGAATAGCAGAATCAGGAGCTGGGACAGGATGAACAGTCTATCCCCCCTTATCGAGTAATATCTCACATAGAGGAGCATCAGTTGATTTAGCTATTTTTTCC…
H8h11	ACTCTATACTTTATCTTCGGAATATGATCTGGAATAGTAGGATCAGCTATAAGATTAATTATCCGTATCGAATTAGGACAGCCTGGAAGATTTATTGGTAATGATCAAATTTATAATGTAATTGTAACAGCACATGCATTTGTAATAATTTTCTTTATAGTAATACCAATCATAATTGGAGGATTCGGTAATTGATTAGTCCCTTTAATAATTGGAGCACCTGATATAGCCTTCCCACGATTAAATAATATAAGATTCTGATTATTACCCCCTTCATTAACTTTATTATTAATAAGAAGAATAGCAGAATCAGGAGCTGGGACAGGATGAACAGTCTATCCCCCTTTATCGAGTAATATCTCACATAGAGGAGCATCAGTTGATTTAGCTATTTTTTCC…
H15n16	ACTCTATACTTTATCTTCGGAATATGATCTGGAATAGTAGGATCAGCTATAAGATTAATTATCCGTATCGAATTAGGACAGCCTGGAAGATTTATTGGTAATGATCAAATTTATAATGTAATTGTAACAGCACATGCATTTGTAATAATTTTCTTTATAGTAATACCAATCATAATTGGAGGATTCGGTAATTGATTAGTCCCTTTAATAATTGGAGCACCTGATATAGCCTTCCCACGATTAAATAATATAAGATTCTGATTATTACCCCCTTCATTAACTTTATTATTAATAAGAAGAATAGCAGAATCAGGAGCTGGGACAGGATGAACAGTCTATCCCCCCTTATCAAGTAATATCTCACATAGAGGAGCATCAGTTGATTTAGCTATTTTTTCC…
H22h3	ACTCTATACTTTATCTTCGGAATATGATCTGGAATAGTAGGATCAGCTATAAGATTAATTATCCGTATCGAATTAGGACAGCCTGGAAGATTTATTGGTAATGATCAAATTTATAATGTAATTGTAACAGCACATGCATTTGTAATAATTTTCTTTATAGTAATACCAATCATAATTGGAGGATTCGGTAATTGATTAGTCCCTTTAATAATTGGAGCACCTGATATAGCCTTCCCACGATTAAATAATATAAGATTCTGATTATTACCCCCTTCATTAACTTTATTATTAATAAGAAGAATAGCAGAATCAGGAGCTGGGACAGGATGAACAGTCTACCCCCCCTTATCGAGTAATATCTCACATAGAGGAGCATCAGTTGATTTAGCTATTTTTTCC…
H22n10	ACTCTATACTTTATCTTCGGAATATGATCTGGAATAGTAGGATCAGCTATAAGATTAATTATCCGTATCGAATTAGGACAGCCTGGAAGATTTATTGGTAATGATCAAATTTATAATGTAATTGTAACAGCACATGCATTTGTAATAATTTTCTTTATAGTAATACCAATCATAATTGGAGGATTCGGTAATTGATTAGTCCCTTTAATAATTGGAGCACCTGATATAGCCTTCCCACGATTAAATAATATAAGATTCTGATTATTACCCCCTTCATTAACTTTATTATTAATAAGAAGAATAGCAGAATCAGGAGCTGGGACAGGATGAACAGTCTACCCCCCCTTATCGAGTAATATCTCACATAGAGGAGCATCAGTTGATTTAGCTATTTTTTCC…
H22n23	ACTCTATACTTTATCTTCGGAATATGATCTGGAATAGTAGGATCAGCTATAAGATTAATTATCCGTATCGAATTAGGACAGCCTGGAAGATTTATTGGTAATGATCAAATTTATAATGTAATTGTAACAGCACATGCATTTGTAATAATTTTCTTTATAGTAATACCAATCATAATTGGAGGATTCGGTAATTGATTAGTCCCTTTAATAATTGGAGCACCTGATATAGCCTTCCCACGATTAAATAATATAAGATTCTGATTATTACCCCCTTCATTAACTTTATTATTAATAAGAAGAATAGCAGAATCAGGAGCTGGGACAGGATGAACAGTCTACCCCCCCTTATCGAGTAATATCTCACATAGAGGAGCATCAGTTGATTTAGCTATTTTTTCC…
H23h11	ACTCTATACTTTATCTTCGGAATATGATCTGGAATAGTAGGATCAGCTATAAGATTAATTATCCGTATCGAATTAGGACAGCCTGGAAGATTTATTGGTAATGATCAAATTTATAATGTAATTGTAACAGCACATGCATTTGTAATAATTTTCTTTATAGTAATACCAATCATAATTGGAGGATTCGGTAATTGATTAGTCCCTTTAATAATTGGAGCACCTGATATAGCCTTCCCACGATTAAATAATATAAGATTCTGATTATTACCCCCTTCATTAACTTTATTATTAATAAGAAGAATAGCAGAATCAGGAGCTGGGACAGGATGAACAGTCTACCCTCCCTTATCGAGTAATATCTCACATAGAGGAGCATCAGTTGATTTAGCTATTTTTTCC…
H23n8	ACTCTATACTTTATCTTCGGAATATGATCTGGAATAGTAGGATCAGCTATAAGATTAATTATCCGTATCGAATTAGGACAGCCTGGAAGATTTATTGGTAATGATCAAATTTATAATGTAATTGTAACAGCACATGCATTTGTAATAATTTTCTTTATAGTAATACCAATCATAATTGGAGGATTCGGTAATTGATTAGTCCCTTTAATAATTGGAGCACCTGATATAGCCTTCCCACGATTAAATAATATAAGATTCTGATTATTACCCCCTTCATTAACTTTATTATTAATAAGAAGAATAGCAGAATCAGGAGCTGGGACAGGATGAACAGTCTACCCTCCCTTATCGAGTAATATCTCACATAGAGGAGCATCAGTTGATTTAGCTATTTTTTCC…
H27h11	ACTCTATACTTTATCTTCGGAATATGATCTGGAATAGTAGGATCAGCTATAAGATTAATTATCCGTATCGAATTAGGACAGCCTGGAAGATTTATTGGTAATGATCAAATTTATAATGTAATTGTAACAGCACATGCATTTGTAATAATTTTCTTTATAGTAATACCAATCATAATTGGAGGATTCGGTAATTGATTAGTCCCTTTAATAATTGGAGCACCTGATATAGCCTTCCCACGATTAAATAATATAAGATTCTGATTATTACCCCCTTCATTAACTTTATTATTAATAAGAAGAATAGCAGAATCAGGAGCTGGGACAGGATGAACAGTCTACCCCCCCTTATCGAGTAATATCTCACATAGAGGAGCATCAGTTGATTTAGCTATTTTTTCC…
H33h3	ACTCTATACTTTATCTTCGGAATATGATCTGGAATAGTAGGATCAGCTATAAGATTAATTATCCGTATCGAATTAGGACAACCTGGAAGATTTATTGGTAATGATCAAATTTATAATGTAATTGTAACAGCACATGCATTTGTAATAATTTTCTTTATAGTAATACCAATCATAATTGGAGGATTCGGTAATTGATTAGTCCCTTTAATAATTGGAGCACCTGATATAGCCTTCCCACGATTAAATAATATAAGATTCTGATTATTACCCCCTTCATTAACTTTATTATTAATAAGAAGAATAGCAGAATCAGGAGCTGGGACAGGATGAACAGTCTACCCCCCCTTATCGAGTAATATCTCACATAGAGGAGCATCAGTTGATTTAGCTATTTTTTCC…
H39h18	ACTCTATACTTTATCTTCGGAATATGATCTGGAATAGTAGGATCAGCTATAAGATTAATTATCCGTATCGAATTAGGACAGCCTGGAAGATTTATTGGTAATGATCAAATTTATAATGTAATTGTAACAGCACATGCATTTGTAATAATTTTCTTTATAGTAATACCAATCATAATTGGAGGATTCGGTAATTGATTAGTCCCTTTAATAATTGGAGCACCTGATATAGCCTTCCCACGATTAAATAATATAAGATTCTGATTATTACCCCCTTCATTAACTTTATTATTAATAAGAAGAATAGCAGAATCAGGAGCTGGGACAGGATGAACAGTCTACCCTCCCTTATCGAGTAATATCTCACATAGAGGAGCATCAGTTGATTTAGCTATTTTTTCC…
H40n2	ACTCTATACTTTATCTTCGGAATATGATCTGGAATAGTAGGATCAGCTATAAGATTAATTATCCGTATCGAATTAGGACAGCCTGGAAGATTTATTGGTAATGATCAAATTTATAATGTAATTGTAACAGCACATGCATTTGTAATAATTTTCTTTATAGTAATACCAATCATAATTGGAGGATTCGGTAATTGATTAGTCCCTTTAATAATTGGAGCACCTGATATAGCCTTCCCACGATTAAATAATATAAGATTCTGATTATTACCCCCTTCATTAACTTTATTATTAATAAGAAGAATAGCAGAATCAGGAGCTGGGACAGGATGAACAGTCTACCCTCCCTTATCGAGTAATATCTCACATAGAGGAGCATCAGTTGATTTAGCTATTTTTTCC…
H41h15	ACTCTATACTTTATCTTCGGAATATGATCTGGAATAGTAGGATCAGCTATAAGATTAATTATCCGTATCGAATTAGGACAGCCTGGAAGATTTATTGGTAATGATCAAATTTATAATGTAATTGTAACAGCACATGCATTTGTAATAATTTTCTTTATAGTAATACCAATCATAATTGGAGGATTCGGTAATTGATTAGTCCCTTTAATAATTGGAGCACCTGATATAGCCTTCCCACGATTAAATAATATAAGATTCTGATTATTACCCCCTTCATTAACTTTATTATTAATAAGAAGAATAGCAGAATCAGGAGCTGGGACAGGATGAACAGTCTACCCTCCCTTATCGAGTAATATCTCACATAGAGGAGCATCAGTTGATTTAGCTATTTTTTCC…
H41h16	ACTCTATACTTTATCTTCGGAATATGATCTGGAATAGTAGGATCAGCTATAAGATTAATTATCCGTATCGAATTAGGACAGCCTGGAAGATTTATTGGTAATGATCAAATTTATAATGTAATTGTAACAGCACATGCATTTGTAATAATTTTCTTTATAGTAATACCAATCATAATTGGAGGATTCGGTAATTGATTAGTCCCTTTAATAATTGGAGCACCTGATATAGCCTTCCCACGATTAAATAATATAAGATTCTGATTATTACCCCCTTCATTAACTTTATTATTAATAAGAAGAATAGCAGAATCAGGAGCTGGGACAGGATGAACAGTCTACCCTCCCTTATCGAGTAATATCTCACATAGAGGAGCATCAGTTGATTTAGCTATTTTTTCC…
H41h17	ACTCTATACTTTATCTTCGGAATATGATCTGGAATAGTAGGATCAGCTATAAGATTAATTATCCGTATCGAATTAGGACAGCCTGGAAGATTTATTGGTAATGATCAAATTTATAATGTAATTGTAACAGCACATGCATTTGTAATAATTTTCTTTATAGTAATACCAATCATAATTGGAGGATTCGGTAATTGATTAGTCCCTTTAATAATTGGAGCACCTGATATAGCCTTCCCACGATTAAATAATATAAGATTCTGATTATTACCCCCTTCATTAACTTTATTATTAATAAGAAGAATAGCAGAATCAGGAGCTGGGACAGGATGAACAGTCTACCCTCCCTTATCGAGTAATATCTCACATAGAGGAGCATCAGTTGATTTAGCTATTTTTTCC…
H43h11	ACTCTATACTTTATCTTCGGAATATGATCTGGAATAGTAGGATCAGCTATAAGATTAATTATCCGTATCGAATTAGGACAGCCTGGAAGATTTATTGGTAATGATCAAATTTATAATGTAATTGTAACAGCACATGCATTTGTAATAATTTTCTTTATAGTAATACCAATCATAATTGGAGGATTCGGTAATTGATTAGTCCCTTTAATAATTGGAGCACCTGATATAGCCTTCCCACGATTAAATAATATAAGATTCTGATTATTACCCCCTTCATTAACTTTATTATTAATAAGAAGAATAGCAGAATCAGGAGCTGGGACAGGATGAACAGTCTACCCTCCCTTATCGAGTAATATCTCACATAGAGGAGCATCAGTTGATTTAGCTATTTTTTCC…
H45h11	ACTCTATACTTTATCTTCGGAATATGATCTGGAATAGTAGGATCAGCTATAAGATTAATTATCCGTATCGAATTAGGACAGCCTGGAAGATTTATTGGTAATGATCAAATTTATAATGTAATTGTAACAGCACATGCATTTGTAATAATTTTCTTTATAGTAATACCAATCATAATTGGAGGATTCGGTAATTGATTAGTCCCTTTAATAATTGGAGCACCTGATATAGCCTTCCCACGATTAAATAATATAAGATTCTGATTATTACCCCCTTCATTAACTTTATTATTAATAAGAAGAATAGCAGAATCAGGAGCTGGGACAGGATGAACAGTCTACCCTCCCTTATCGAGTAATATCTCACATAGAGGAGCATCAGTTGATTTAGCTATTTTTTCC…
H45n11	ACTCTATACTTTATCTTCGGAATATGATCTGGAATAGTAGGATCAGCTATAAGATTAATTATCCGTATCGAATTAGGACAGCCTGGAAGATTTATTGGTAATGATCAAATTTATAATGTAATTGTAACAGCACATGCATTTGTAATAATTTTCTTTATAGTAATACCAATCATAATTGGAGGATTCGGTAATTGATTAGTCCCTTTAATAATTGGAGCACCTGATATAGCCTTCCCACGATTAAATAATATAAGATTCTGATTATTACCCCCTTCATTAACTTTATTATTAATAAGAAGAATAGCAGAATCAGGAGCTGGGACAGGATGAACAGTCTACCCTCCCTTATCGAGTAATATCTCACATAGAGGAGCATCAGTTGATTTAGCTATTTTTTCC…
ICM2h3	ACTCTATACTTTATCTTCGGGATATGATCTGGAATAGTAGGATCAGCTATAAGATTAATTATCCGTATCGAATTAGGACAGCCTGGAAGATTTATTGGTAATGATCAAATTTATAATGTAATTGTAACAGCACATGCATTTGTAATAATTTTCTTTATAGTAATACCAATCATAATTGGAGGATTCGGTAATTGATTAGTCCCTTTAATAATTGGAGCACCTGATATAGCCTTCCCACGATTAAATAATATAAGATTCTGATTATTACCCCCTTCATTAACTTTATTATTAATAAGAAGAATAGCAGAATCAGGAGCTGGGACAGGATGAACAGTCTACCCCCCCTTATCGAGTAATATCTCACATAGAGGAGCATCAGTTGATTTAGCTATTTTTTCC…
N1h3	ACTCTATACTTTATCTTCGGAATATGATCTGGAATAGTAGGATCAGCTATAAGATTAATTATCCGTATCGAATTAGGACAGCCTGGAAGATTTATTGGTAATGATCAAATTTATAATGTAATTGTAACAGCACATGCATTTGTAATAATTTTCTTTATAGTAATACCAATCATAATTGGAGGATTCGGTAATTGATTAGTCCCTTTAATAATTGGAGCACCTGATATAGCCTTCCCACGATTAAATAATATAAGATTCTGATTATTACCCCCTTCATTAACTTTATTATTAATAAGAAGAATAGCAGAATCAGGAGCTGGGACAGGATGAACAGTCTACCCCCCCTTATCGAGTAATATCTCACATAGAGGAGCATCAGTTGATTTAGCTATTTTTTCC…
N3n3	ACTCTATACTTTATCTTCGGAATATGATCTGGAATAGTAGGATCAGCTATAAGATTAATTATCCGTATCGAATTAGGACAGCCTGGAAGATTTATTGGTAATGATCAAATTTATAACGTAATTGTAACAGCACATGCATTTGTAATAATTTTCTTTATAGTAATACCAATCATAATTGGAGGATTCGGTAATTGATTAGTCCCTTTAATAATTGGAGCACCTGATATAGCCTTCCCACGATTAAATAATATAAGATTCTGATTATTACCCCCTTCATTAACTTTATTATTAATAAGAAGAATAGCAGAATCAGGAGCTGGGACAGGATGAACAGTCTACCCTCCCTTATCGAGTAATATCTCACATAGAGGAGCATCAGTTGATTTAGCTATTTTTTCC…
N4n4	ACTCTATACTTTATCTTCGGAATATGATCTGGAATAGTAGGATCAGCTATAAGATTAATTATCCGTATCGAATTAGGACAGCCTGGAAGATTTATTGGTAATGATCAAATTTATAATGTAATTGTAACAGCACATGCATTTGTAATAATTTTCTTTATAGTAATACCAATCATAATTGGAGGATTCGGTAATTGATTAGTCCCTTTAATAATTGGAGCACCTGATATAGCCTTCCCACGATTAAATAATATAAGATTCTGATTATTACCCCCTTCATTAACTTTATTATTAATAAGAAGAATAGCAGAATCAGGAGCTGGGACAGGATGAACAGTCTACCCTCCCTTATCGAGTAATATCTCACATAGAGGAGCATCAGTTGATTTAGCTATTTTTTCC…
N5n3	ACTCTATACTTTATCTTCGGAATATGATCTGGAATAGTAGGATCAGCTATAAGATTAATTATCCGTATCGAATTAGGACAGCCTGGAAGATTTATTGGTAATGATCAAATTTATAATGTAATTGTAACAGCACATGCATTTGTAATAATTTTCTTTATAGTAATACCAATCATAATTGGAGGATTCGGTAATTGATTAGTCCCTTTAATAATTGGAGCACCTGATATAGCCTTCCCACGATTAAATAATATAAGATTCTGATTATTACCCCCTTCATTAACTTTATTATTAATAAGAAGAATAGCAGAATCAGGAGCTGGGACAGGATGAACAGTCTACCCTCCCTTATCGAGTAATATCTCACATAGAGGAGCATCAGTTGATTTAGCTATTTTTTCC…
N5n5	ACTCTATACTTTATCTTCGGAATATGATCTGGAATAGTAGGATCAGCTATAAGATTAATTATCCGTATCGAATTAGGACAGCCTGGAAGATTTATTGGTAATGATCAAATTTATAATGTAATTGTAACAGCACATGCATTTGTAATAATTTTCTTTATAGTAATACCAATCATAATTGGAGGATTCGGTAATTGATTAGTCCCTTTAATAATTGGAGCACCTGATATAGCCTTCCCACGATTAAATAATATAAGATTCTGATTATTACCCCCTTCATTAACTTTATTATTAATAAGAAGAATAGCAGAATCAGGAGCTGGGACAGGATGAACAGTCTACCCTCCCTTATCGAGTAATATCTCACATAGAGGAGCATCAGTTGATTTAGCTATTTTTTCC…
N6h3	ACTCTATACTTTATCTTCGGAATATGATCTGGAATAGTAGGATCAGCTATAAGATTAATTATCCGTATCGAATTAGGACAGCCTGGAAGATTTATTGGTAATGATCAAATTTATAATGTAATTGTAACAGCACATGCATTTGTAATAATTTTCTTTATAGTAATACCAATCATAATTGGAGGATTCGGTAATTGATTAGTCCCTTTAATAATTGGAGCACCTGATATAGCCTTCCCACGATTAAATAATATAAGATTCTGATTATTACCCCCTTCATTAACTTTATTATTAATAAGAAGAATAGCAGAATCAGGAGCTGGGACAGGATGAACAGTCTACCCCCCCTTATCGAGTAATATTTCACATAGAGGAGCATCAGTTGATTTAGCTATTTTTTCC…
N6n17	ACTCTATACTTTATCTTCGGAATATGATCTGGAATAGTAGGATCAGCTATAAGATTAATTATCCGTATCGAATTAGGACAGCCTGGAAGATTTATTGGTAATGATCAAATTTATAATGTAATTGTAACAGCACATGCATTTGTAATAATTTTCTTTATAGTAATACCAATCATAATTGGAGGATTCGGTAATTGATTAGTCCCTTTAATAATTGGAGCACCTGATATAGCCTTCCCACGATTAAATAATATAAGATTCTGATTATTACCCCCTTCATTAACTTTATTATTAATAAGAAGAATAGCAGAATCAGGAGCTGGGACAGGATGAACAGTCTACCCCCCCTTATCGAGTAATATTTCACATAGAGGAGCATCAGTTGATTTAGCTATTTTTTCC…
N7h3	ACTCTATACTTTATCTTCGGAATATGATCTGGAATAGTAGGATCAGCTATAAGATTAATTATCCGTATCGAATTAGGACAGCCTGGAAGATTTATTGGTAATGATCAAATTTATAATGTAATTGTAACAGCACATGCATTTGTAATAATTTTCTTTATAGTAATACCAATCATAATTGGAGGATTCGGTAATTGATTAGTCCCTTTAATAATTGGAGCACCTGATATAGCCTTCCCACGATTAAATAATATAAGATTCTGATTATTACCCCCTTCATTAACTTTATTATTAATAAGAAGAATAGCAGAATCAGGAGCTGGGACAGGATGAACAGTCTACCCCCCCTTATCGAGTAATATTTCACATAGAGGAGCATCAGTTGATTTAGCTATTTTTTCC…
N8n15	ACTCTATACTTTATCTTCGGAATATGGTCTGGAATAGTAGGATCAGCTATAAGATTAATTATCCGTATCGAATTAGGACAGCCTGGAAGATTTATTGGTAATGATCAAATTTATAATGTAATTGTAACAGCACATGCATTTGTAATAATTTTCTTTATAGTAATACCAATCATAATTGGAGGATTCGGTAATTGATTAGTCCCTTTAATAATTGGAGCACCTGATATAGCCTTCCCACGATTAAATAATATAAGATTCTGATTATTACCCCCTTCATTAACTTTATTATTAATAAGAAGAATAGCAGAATCAGGAGCTGGGACAGGATGAACAGTCTACCCCCCCTTATCAAGTAATATCTCACATAGAGGAGCATCAGTTGATTTAGCTATTTTTTCC…
N9n18	ACTCTATACTTTATCTTCGGAATATGATCTGGAATAGTAGGATCAGCTATAAGATTAATTATCCGTATCGAATTAGGGCAGCCTGGAAGATTTATTGGTAATGATCAAATTTATAATGTAATTGTAACAGCACATGCATTTGTAATAATTTTCTTTATAGTAATACCAATCATAATTGGAGGATTCGGTAATTGATTAGTCCCTTTAATAATTGGAGCACCTGATATAGCCTTCCCACGATTAAATAATATAAGATTCTGATTATTACCCCCTTCATTAACTTTATTATTAATAAGAAGAATAGCAGAATCAGGAGCTGGGACAGGATGAACAGTCTACCCCCCCTTATCGAGTAATATCTCACATAGAGGAGCATCAGTTGATTTAGCTATTTTTTCC…
N12n13	ACTCTATATTTTATCTTCGGAATATGATCTGGAATAGTAGGATCAGCTATAAGATTAATTATCCGTATCGAATTAGGACAGCCTGGAAGATTTATTGGTAATGATCAAATTTATAATGTAATTGTAACAGCACATGCATTTGTAATAATTTTCTTTATAGTAATACCAATCATAATTGGAGGATTCGGTAATTGATTAGTCCCTTTAATAATTGGAGCACCTGATATAGCCTTCCCACGATTAAATAATATAAGATTCTGATTATTACCCCCTTCATTAACTTTATTATTAATAAGAAGAATAGCAGAATCAGGAGCTGGGACAGGATGAACAGTCTACCCTCCCTTATCGAGTAATATCTCACATAGAGGAGCATCAGTTGATTTAGCTATTTTTTCC…
N13h11	ACTCTATACTTTATCTTCGGAATATGATCTGGAATAGTAGGATCAGCTATAAGATTAATTATCCGTATCGAATTAGGACAGCCTGGAAGATTTATTGGTAATGATCAAATTTATAATGTAATTGTAACAGCACATGCATTTGTAATAATTTTCTTTATAGTAATACCAATCATAATTGGAGGATTCGGTAATTGATTAGTCCCTTTAATAATTGGAGCACCTGATATAGCCTTCCCACGATTAAATAATATAAGATTCTGATTATTACCCCCTTCATTAACTTTATTATTAATAAGAAGAATAGCAGAATCAGGAGCTGGGACAGGATGAACAGTTTACCCTCCCTTATCGAGTAATATCTCACATAGAGGAGCATCAGTTGATTTAGCTATTTTTTCC…
N14h11	ACTCTATACTTTATCTTCGGAATATGATCTGGAATAGTAGGATCAGCTATAAGATTAATTATCCGTATCGAATTGGGACAGCCTGGAAGATTTATTGGTAATGATCAAATTTATAATGTAATTGTAACAGCACATGCATTTGTAATAATTTTCTTTATAGTAATACCAATCATAATTGGAGGATTCGGTAATTGATTAGTCCCTTTAATAATTGGAGCACCTGATATAGCCTTCCCACGATTAAATAATATAAGATTCTGATTATTACCCCCTTCATTAACTTTATTATTAATAAGAAGAATAGCAGAATCAGGAGCTGGGACAGGATGAACAGTCTACCCTCCCTTATCGAGTAATATCTCACATAGAGGAGCATCAGTTGATTTAGCTATTTTTTCC…
N15n13	ACTCTATACTTTATCTTCGGAATATGATCTGGAATAGTAGGATCAGCTATAAGATTAATTATCCGTATCGAATTAGGACAACCTGGAAGATTTATTGGTAATGATCAAATTTATAATGTAATTGTAACAGCACATGCATTTGTAATAATTTTCTTTATAGTAATACCAATCATAATTGGAGGATTCGGTAATTGATTAGTCCCTTTAATAATTGGAGCACCTGATATAGCCTTCCCACGATTAAATAATATAAGATTCTGATTATTACCCCCTTCATTAACTTTATTATTAATAAGAAGAATAGCAGAATCAGGAGCTGGGACAGGATGAACAGTCTACCCTCCCTTATCGAGTAATATCTCACATAGAGGAGCATCAGTTGATTTAGCTATTTTTTCC…
N16h11	ACTCTATACTTTATCTTCGGAATATGGTCTGGAATAGTAGGATCAGCTATAAGATTAATTATCCGTATCGAATTAGGACAGCCTGGAAGATTTATTGGTAATGATCAAATTTATAATGTAATTGTAACAGCACATGCATTTGTAATAATTTTCTTTATAGTAATACCAATCATAATTGGAGGATTCGGTAATTGATTAGTCCCTTTAATAATTGGAGCACCTGATATAGCCTTCCCACGATTAAATAATATAAGATTCTGATTATTACCCCCTTCATTAACTTTATTATTAATAAGAAGAATAGCAGAATCAGGAGCTGGGACAGGATGAACAGTCTACCCTCCCTTATCGAGTAATATCTCACATAGAGGAGCATCAGTTGATTTAGCTATTTTTTCC…
N21h11	ACTCTATACTTTATCTTCGGAATATGATCTGGAATAGTAGGATCAGCTATAAGATTAATTATCCGTATCGAATTAGGACAGCCTGGAAGATTTATTGGTAATGATCAAATTTATAATGTAATTGTAACAGCACATGCATTTGTAATAATTTTCTTTATAGTAATACCAATCATAATTGGAGGATTCGGTAATTGATTAGTCCCTTTAATAATTGGAGCACCTGATATAGCCTTCCCACGATTAAATAATATAAGATTCTGATTATTACCCCCTTCATTAACTTTATTATTAATAAGAAGAATAGCAGAATCAGGAGCTGGGACAGGATGAACAGTCTACCCTCCCTTATCGAGTAATATCTCACATAGAGGAGCATCAGTTGATTTAGCTATTTTTTCC…
N22h11	ACTCTATACTTTATCTTCGGAATATGATCTGGAATAGTAGGATCAGCTATAAGATTAATTATCCGTATCGAATTAGGACAGCCTGGAAGATTTATTGGTAATGATCAAATTTATAATGTAATTGTAACAGCACATGCATTTGTAATAATTTTCTTTATAGTAATACCAATCATAATTGGAGGATTCGGTAATTGATTAGTCCCTTTAATAATTGGAGCACCTGATATAGCCTTCCCACGATTAAATAATATAAGATTCTGATTATTACCCCCTTCATTAACTTTATTATTAATAAGAAGAATAGCAGAATCAGGAGCTGGGACAGGATGAACAGTCTACCCTCCCTTATCGAGTAATATCTCACATAGAGGAGCATCAGTTGATTTAGCTATTTTTTCC…
N22n14	ACTCTATACTTTATCTTCGGAATATGATCTGGAATAGTAGGATCAGCTATAAGATTAATTATCCGTATCGAATTAGGACAGCCTGGAAGATTTATTGGTAATGATCAAATTTATAATGTAATTGTAACAGCACATGCATTTGTAATAATTTTCTTTATAGTAATACCAATCATAATTGGAGGATTCGGTAATTGATTAGTCCCTTTAATAATTGGAGCACCTGATATAGCCTTCCCACGATTAAATAATATAAGATTCTGATTATTACCCCCTTCATTAACTTTATTATTAATAAGAAGAATAGCAGAATCAGGAGCTGGGACAGGATGAACAGTCTACCCTCCCTTATCGAGTAATATCTCACATAGAGGAGCATCAGTTGATTTAGCTATTTTTTCC…
N25h18	ACTCTATACTTTATCTTCGGAATATGATCTGGAATAGTAGGATCAGCTATAAGATTAATTATCCGTATCGAATTAGGACAGCCTGGAAGATTTATTGGTAATGATCAAATTTATAATGTAATTGTAACAGCACATGCATTTGTAATAATTTTCTTTATAGTAATACCAATCATAATTGGAGGATTCGGTAATTGATTAGTCCCTTTAATAATTGGAGCACCTGATATAGCCTTCCCACGATTAAATAATATAAGATTCTGATTATTACCCCCTTCATTAACTTTATTATTAATAAGAAGAATAGCAGAATCAGGAGCTGGGACAGGATGAACAGTTTACCCTCCCTTATCGAGTAATATCTCACATAGAGGAGCATCAGTTGATTTAGCTATTTTTTCC…
N26h11	ACTCTATACTTTATCTTCGGAATATGATCTGGAATAGTAGGATCAGCTATAAGATTAATTATCCGTATCGAATTAGGACAGCCGGGAAGATTTATTGGTAATGATCAAATTTATAATGTAATTGTAACAGCACATGCATTTGTAATAATTTTCTTTATAGTAATACCAATCATAATTGGAGGATTCGGTAATTGATTAGTCCCTTTAATAATTGGAGCACCTGATATAGCCTTCCCACGATTAAATAATATAAGATTCTGATTATTACCCCCTTCATTAACTTTATTATTAATAAGAAGAATAGCAGAATCAGGAGCTGGGACAGGATGAACAGTCTACCCTCCCTTATCGAGTAATATCTCACATAGAGGAGCATCAGTTGATTTAGCTATTTTTTCC…
N27h11	ACTCTATACTTTATCTTCGGAATATGATCTGGAATAGTAGGATCAGCTATAAGATTAATTATCCGTATCGAATTAGGACAGCCTGGAAGATTTATTGGTAATGATCAAATTTATAATGTAATTGTAACAGCACATGCATTTGTAATAATTTTCTTTATAGTAATACCAATCATAATTGGAGGATTCGGTAATTGATTAGTCCCTTTAATAATTGGAGCACCTGATATAGCCTTCCCACGATTAAATAATATAAGATTCTGATTATTACCCCCTTCATTAACTTTATTATTAATAAGAAGAATAGCAGAATCAGGAGCTGGGACAGGATGAACAGTCTACCCTCCCTTATCGAGTAATATCTCACATAGAGGAGCATCAGTTGATTTAGCTATTTTTTCC…
N28h4	ACTCTATACTTTATCTTCGGAATATGATCTGGAATAGTAGGATCAGCTATAAGATTAATTATCCGTATCGAATTAGGACAGCCTGGAAGATTTATTGGCAATGATCAAATTTATAATGTAATTGTAACAGCACATGCATTTGTAATAATTTTCTTTATAGTAATACCAATCATAATTGGAGGATTCGGTAATTGATTAGTCCCTTTAATAATTGGAGCACCTGATATAGCCTTCCCACGATTAAATAATATAAGATTCTGATTATTACCCCCTTCATTAACTTTATTATTAATAAGAAGAATAGCAGAATCAGGAGCTGGGACAGGATGAACAGTCTACCCCCCTTTATCGAGTAATATCTCACATAGAGGAGCATCAGTTGATTTAGCTATTTTTTCC…
N30h3	ACTCTATACTTTATCTTCGGAATATGATCTGGAATAGTAGGATCAGCTATAAGATTAATTATCCGTATCGAATTAGGACAGCCTGGAAGATTTATTGGTAATGATCAAATTTATAATGTAATTGTAACAGCACATGCATTTGTAATAATTTTCTTTATAGTAATACCAATCATAATTGGAGGATTCGGTAATTGATTAGTCCCTTTAATAATTGGAGCACCTGATATAGCCTTCCCACGATTAAATAATATAAGATTCTGATTATTACCCCCTTCATTAACTTTATTATTAATAAGAAGAATAGCAGAATCAGGAGCTGGGACAGGATGAACAGTCTACCCCCCCTTATCGAGTAATATCTCACATAGAGGAGCATCAGTTGATTTAGCTATTTTTTCC…
N32h1	ACTCTATACTTTATCTTCGGAATATGATCTGGAATAGTAGGATCAGCTATAAGATTAATTATCCGTATCGAATTAGGACAGCCTGGAAGATTTATTGGTAATGATCAAATTTATAATGTAATTGTAACAGCACATGCATTTGTAATAATTTTCTTTATAGTAATACCAATCATAATTGGAGGATTCGGTAATTGATTAGTCCCTTTAATAATTGGAGCACCTGATATAGCCTTCCCACGATTAAATAATATAAGATTCTGATTATTACCCCCTTCATTAACTTTATTATTAATAAGAAGAATAGCAGAATCAGGAGCTGGGACAGGATGAACAGTCTATCCTCCCTTATCAAGTAATATCTCACATAGAGGAGCATCAGTTGATTTAGCTATTTTTTCC…
N34n12	ACTCTATACTTTATCTTCGGAATATGATCTGGAATAGTAGGATCAGCTATAAGATTAATTATCCGTATCGAATTAGGACAGCCTGGAAGATTTATTGGTAATGATCAAATTTATAATGTAATTGTAACAGCACATGCATTTGTAATAATTTTCTTTATAGTAATACCAATCATAATTGGAGGATTCGGTAATTGATTAGTCCCTTTAATAATTGGAGCACCTGATATAGCCTTCCCACGATTAAATAATATAAGATTCTGATTATTACCCCCTTCATTAACTTTATTATTAATAAGAAGAATAGCAGAATCAGGAGCTGGGACAGGATGAACAGTCTACCCTCCCTTATCGAGTAATATTTCACATAGAGGAGCATCAGTTGATTTAGCTATTTTTTCC…
N35h11	ACTCTATACTTTATCTTCGGAATATGATCTGGAATAGTAGGATCAGCTATAAGATTAATTATCCGTATCGAATTAGGACAGCCTGGAAGATTTATTGGTAATGATCAAATTTATAATGTAATTGTAACAGCACATGCATTTGTAATAATTTTCTTTATAGTAATACCAATCATAATTGGAGGATTCGGTAATTGATTAGTCCCTTTAATAATTGGAGCACCTGATATAGCCTTCCCACGATTAAATAATATAAGATTCTGATTATTACCCCCTTCATTAACTTTATTATTAATAAGAAGAATAGCAGAATCAGGAGCTGGGACAGGATGAACAGTCTACCCCCCCTTATCGAGTAATATCTCACATAGAGGAGCATCAGTTGATTTAGCTATTTTTTCC…
N36h11	ACTCTATACTTTATCTTCGGAATATGATCTGGAATAGTAGGATCAGCTATAAGATTAATTATCCGTATCGAATTAGGACAGCCTGGAAGATTTATTGGTAATGATCAAATTTATAATGTAATTGTAACAGCACATGCATTTGTAATAATTTTCTTTATAGTAATACCAATCATAATTGGAGGATTCGGTAATTGATTAGTCCCTTTAATAATTGGAGCACCTGATATAGCCTTCCCACGATTAAATAATATAAGATTCTGATTATTACCCCCTTCATTAACTTTATTATTAATAAGAAGAATAGCAGAATCAGGAGCTGGGACAGGATGAACAGTCTACCCTCCCTTATCGAGTAATATCTCACATAGAGGAGCATCAGTTGATTTAGCTATTTTTTCC…
N37h11	ACTCTATACTTTATCTTCGGAATATGGTCTGGAATAGTAGGATCAGCTATAAGATTAATTATCCGTATCGAATTAGGACAGCCTGGAAGATTTATTGGTAATGATCAAATTTATAATGTAATTGTAACAGCACATGCATTTGTAATAATTTTCTTTATAGTAATACCAATCATAATTGGAGGATTCGGTAATTGATTAGTCCCTTTAATAATTGGAGCACCTGATATAGCCTTCCCACGATTAAATAATATAAGATTCTGATTATTACCCCCTTCATTAACTTTATTATTAATAAGAAGAATAGCAGAATCAGGAGCTGGGACAGGATGAACAGTCTACCCTCCCTTATCGAGTAATATCTCACATAGAGGAGCATCAGTTGATTTAGCTATTTTTTCC…
N39h11	ACTCTATACTTTATCTTCGGAATATGATCTGGAATAGTAGGATCAGCTATAAGATTAATTATCCGTATCGAATTAGGACAGCCTGGAAGATTTATTGGTAATGATCAAATTTATAATGTAATTGTAACAGCACATGCATTTGTAATAATTTTCTTTATAGTAATACCAATCATAATTGGAGGATTCGGTAATTGATTAGTCCCTTTAATAATTGGAGCACCTGATATAGCCTTCCCACGATTAAATAATATAAGATTCTGATTATTACCCCCTTCATTAACTTTATTATTAATAAGAAGAATAGCAGAATCAGGAGCTGGGACAGGATGAACAGTCTACCCTCCCTTATCAAGTAATATCTCACATAGAGGAGCATCAGTTGATTTAGCTATTTTTTCC…
N40h11	ACTCTATACTTTATCTTCGGAATATGATCTGGAATAGTAGGATCAGCTATAAGATTAATTATCCGTATCGAATTAGGACAGCCTGGAAGATTTATTGGTAATGATCAAATTTATAATGTAATTGTAACAGCACATGCATTTGTAATAATTTTCTTTATAGTAATACCAATCATAATTGGAGGATTCGGTAATTGATTAGTCCCTTTAATAATTGGAGCACCTGATATAGCCTTCCCACGATTAAATAATATAAGATTCTGATTATTACCCCCTTCATTAACTTTATTATTAATAAGAAGAATAGCAGAATCAGGAGCTGGGACAGGATGAACAGTCTACCCTCCCTTATCGAGTAATATCTCACATAGAGGAGCATCAGTTGATTTAGCTATTTTTTCC…
N41h11	ACTCTATACTTTATCTTCGGAATATGATCTGGAATAGTAGGATCAGCTATAAGATTAATTATCCGTATCGAATTAGGACAGCCTGGAAGATTTATTGGTAATGATCAAATTTACAATGTAATTGTAACAGCACATGCATTTGTAATAATTTTCTTTATAGTAATACCAATCATAATTGGAGGATTCGGTAATTGATTAGTCCCTTTAATAATTGGAGCACCTGATATAGCCTTCCCACGATTAAATAATATAAGATTCTGATTATTACCCCCTTCATTAACTTTATTATTAATAAGAAGAATAGCAGAATCAGGAGCTGGGACAGGATGAACAGTATACCCTCCCTTATCGAGTAATATCTCACATAGAGGAGCATCAGTTGATTTAGCTATTTTTTCC…
N43h11	ACTCTATACTTTATCTTCGGAATATGATCTGGAATAGTAGGATCAGCTATAAGATTAATTATCCGTATCGAATTAGGACAGCCTGGAAGATTTATTGGTAATGATCAAATTTACAATGTAATTGTAACAGCACATGCATTTGTAATAATTTTCTTTATAGTAATACCAATCATAATTGGAGGATTCGGTAATTGATTAGTCCCTTTAATAATTGGAGCACCTGATATAGCCTTCCCACGATTAAATAATATAAGATTCTGATTATTACCCCCTTCATTAACTTTATTATTAATAAGAAGAATAGCAGAATCAGGAGCTGGGACAGGATGAACAGTCTACCCTCCCTTATCGAGTAATATCTCACATAGAGGAGCATCAGTTGATTTAGCTATTTTTTCC…
N45h11	ACTCTATACTTTATCTTCGGAATATGATCTGGAATAGTAGGATCAGCTATAAGATTAATTATCCGTATCGAATTAGGACAGCCTGGAAGATTTATTGGTAATGATCAAATTTATAATGTAATTGTAACAGCACATGCATTTGTAATAATTTTCTTTATAGTAATACCAATCATAATTGGAGGATTCGGTAATTGATTAGTCCCTTTAATAATTGGAGCACCTGATATAGCCTTCCCACGATTAAATAATATAAGATTCTGATTATTACCCCCTTCATTAACTTTATTATTAATAAGAAGAATAGCAGAATCAGGAGCTGGGACAGGATGAACAGTCTACCCTCCCTTATCGAGTAATATCTCACATAGAGGAGCATCAGTTGATTTAGCTATTTTTTCC…
N46h11	ACTCTATACTTTATCTTCGGAATATGATCTGGAATAGTAGGATCAGCTATAAGATTAATTATCCGTATCGAATTAGGACAGCCTGGAAGATTTATTGGTAATGATCAAATTTATAATGTAATTGTAACAGCACATGCATTTGTAATAATTTTCTTTATAGTAATACCAATCATAATTGGAGGATTCGGTAATTGATTAGTCCCTTTAATAATTGGAGCACCTGATATAGCCTTCCCACGATTAAATAATATAAGATTCTGATTATTACCCCCTTCATTAACTTTATTATTAATAAGAAGAATAGCAGAATCGGGAGCTGGGACAGGATGAACAGTCTACCCTCCCTTATCGAGTAATATCTCACATAGAGGAGCATCAGTTGATTTAGCTATTTTTTCC…
N47h3	ACTCTATACTTTATCTTCGGGATATGATCTGGAATAGTAGGATCAGCTATAAGATTAATTATCCGTATCGAATTAGGACAGCCTGGAAGATTTATTGGTAATGATCAAATTTATAATGTAATTGTAACAGCACATGCATTTGTAATAATTTTCTTTATAGTAATACCAATCATAATTGGAGGATTCGGTAATTGATTAGTCCCTTTAATAATTGGAGCACCTGATATAGCCTTCCCACGATTAAATAATATAAGATTCTGATTATTACCCCCTTCATTAACTTTATTATTAATAAGAAGAATAGCAGAATCAGGAGCTGGGACAGGATGAACAGTCTATCCCCCCTTATCGAGTAATATCTCACATAGAGGAGCATCAGTTGATTTAGCTATTTTTTCC…

## Sheet: Distribution of COICOII haps
Geographical distribution of mtDNA COI-COII combined haplotypes of H. halys in the current study. The COI haplotypes are indicated with uppercase letters. The COII haplotypes are indicated with lowercase letters. The haplotype names with a prefix ‘H or h’ represent the previously reported haplotypes while those with ‘N or n’ represent the newly detected haplotypes in this study. The numbers of in…
	Native countries		Group B			Group A
	China	Japan	Austria	Serbia	Slovenia	Chile	Georgia	Hungary	Italy	Romania	Turkey	the USA
H1h1	25		3	4	10	30	31	85	23	23	11	24
H1n1	1
H2h4	4
H3h3	5		8	5	4	1		4	1
H3h5	3
H3n20	1
H8h11			2
H15n16	1
H22h3	11
H22n10	1
H22n23	1
H23h11		8
H23n8		1
H27h11		2
H33h3	20
H39h18		2
H40n2		1
H41h15		1						1
H41h16		1
H41h17		1
H43h11		2
H45h11		9
H45n11		1
H48h3			2
N1h3	1
N3n3	1
N4n4	1
N5n3	1
N5n5	3
N6h3	2
N6n17	2
N7h3	1
N8n15	1
N9n18	1
N12n13		1
N13h11		1
N14h11		1
N15n13		1
N16h11		1
N21h11		1
N22h11		9
N22n14		1
N25h18		1
N26h11		1
N27h11		1
N28h4	1
N30h3	1
N32h1	1
N34n12		1
N35h11		1
N36h11		1
N37h11		1
N39h11		1
N40h11		6
N41h11		2
N43h11		2
N45h11		1
N46h11		1
N47h3					1
Total	90	65	15	9	15	31	31	90	24	23	11	24
